# Supplementary material
Source: PubMed Central journal article supplement (PMC4119405)
Supplement: supp_ddu167_ddu167supp_table3.pdf [file supp_ddu167_ddu167supp_table3.pdf]

| NM        | Gene      | D4      | D8      | D11     | D14     |
|-----------|-----------|---------|---------|---------|---------|
| NM_004924 | ACTN4     | 191.606 | 227.71  | 228.475 | 162.476 |
| NM_001015 | RPS11     | 1272.57 | 1476.54 | 1084.69 | 944.78  |
| NM_152914 | C17orf103 | 5.4691  | 35.1628 | 73.6418 | 138.43  |
| NM_001021 | RPS17     | 1252.18 | 1498.96 | 1098.62 | 776.279 |
| NM_004559 | YBX1      | 730.716 | 567.438 | 606.778 | 461.839 |
| NM_002789 | PSMA4     | 131.762 | 84.6185 | 84.216  | 62.1124 |
| NR_003004 | SCARNA22  | 32.266  | 86.2107 | 71.3165 | 256.369 |
| NM_001487 | BLOC1S1   | 133.763 | 164.985 | 186.845 | 191.82  |
| NM_002696 | POLR2G    | 139.128 | 86.9026 | 84.05   | 65.7126 |
| NM_004553 | NDUFS6    | 295.205 | 180.347 | 225.598 | 163.496 |
| NM_003294 | TPSAB1    | 195.441 | 373.23  | 506.453 | 274.604 |
| NM_000342 | SLC4A1    | 1.6095  | 737.801 | 1556.83 | 2056.31 |
| NM_001064 | TKT       | 512.636 | 428.102 | 310.258 | 214.051 |
| NM_014762 | DHCR24    | 213.529 | 131.963 | 104.593 | 56.9398 |
| NM_001540 | HSPB1     | 162.265 | 236.448 | 224.207 | 200.699 |
| NM_002627 | PFKP      | 96.6358 | 181.144 | 78.7738 | 47.0796 |
| NM_003258 | TK1       | 130.512 | 234.314 | 223.537 | 208.988 |
| NM_001114 | ENG       | 134.573 | 130.057 | 88.6398 | 59.9076 |
| NM_002743 | PRKCSH    | 159.518 | 136.53  | 100.852 | 77.207  |
| NM_153828 | RTN4      | 103.16  | 133.921 | 104.065 | 76.3477 |
| NM_001084 | DDT       | 105.825 | 137.414 | 90.2074 | 78.8037 |
| NM_003761 | VAMP8     | 168.343 | 78.9617 | 67.5681 | 42.3698 |
| NM_002823 | PTMA      | 351.708 | 322.388 | 137.177 | 161.524 |
| NM_005051 | QARS      | 170.377 | 150.361 | 122.549 | 87.7862 |
| NM_007104 | RPL10A    | 871.507 | 681.504 | 531.964 | 439.197 |
| NM_003827 | NAPA      | 95.4538 | 96.439  | 129.736 | 136.858 |
| NM_000987 | RPL26     | 698.698 | 780.775 | 545.219 | 401.89  |
| NM_004548 | NDUFB10   | 176.981 | 133.911 | 136.443 | 99.8396 |
| NM_004255 | COX5A     | 253.208 | 192.904 | 167.667 | 120.901 |
| NR_028370 | PCNA-AS1  | 468.113 | 585.906 | 564.075 | 458.809 |
| NR_000027 | SNORD83A  | 308.029 | 0       | 0       | 0       |
| NM_002635 | SLC25A3   | 332.808 | 324.634 | 252.335 | 200.957 |
| NM_006563 | KLF1      | 278.295 | 468.131 | 571.346 | 588.29  |
| NM_002476 | MYL4      | 45.0161 | 198.522 | 210.54  | 237.052 |
| NM_002212 | EIF6      | 187.12  | 126.207 | 117.045 | 84.3089 |
| NM_022551 | RPS18     | 113.885 | 182.508 | 98.5541 | 64.3915 |
| NM_021128 | POLR2L    | 304.575 | 172.006 | 218.957 | 172.115 |
| NM_021103 | TMSB10    | 1010.97 | 893.458 | 358.402 | 184.049 |
| NM_004493 | HSD17B10  | 131.042 | 111.46  | 122.96  | 89.8662 |
| NM_146387 | MRPL4     | 156.909 | 94.7302 | 94.5643 | 59.1332 |
| NM_003313 | TSTA3     | 88.6523 | 188.688 | 298.276 | 290.396 |

|                     |         |         |         |         |
|---------------------|---------|---------|---------|---------|
| NM_004317 ASNA1     | 123.573 | 114.976 | 129.244 | 116.699 |
| NM_005520 HNRNPH1   | 378.997 | 294.667 | 288.825 | 215.774 |
| NM_005796 NUTF2     | 179.259 | 137.514 | 145.001 | 119.67  |
| NR_002212 NUDT4P1   | 26.0059 | 42.5202 | 81.9796 | 138.886 |
| NM_001136 NFE2      | 165.122 | 199.099 | 252.66  | 328.526 |
| NM_015987 HEBP1     | 97.0347 | 193.094 | 189.216 | 174.681 |
| NM_001923 DDB1      | 169.088 | 153.052 | 146.241 | 127.446 |
| NM_016172 UBAC1     | 118.529 | 375.985 | 375.95  | 368.956 |
| NM_004691 ATP6VOD1  | 108.356 | 149.653 | 181.537 | 165.138 |
| NM_004864 GDF15     | 3.96428 | 83.3301 | 254.88  | 868.401 |
| NM_014330 PPP1R15A  | 25.9329 | 167.076 | 151.85  | 251.122 |
| NM_000981 RPL19     | 1047.52 | 989.936 | 787.318 | 633.578 |
| NM_018959 DAZAP1    | 168.296 | 136.912 | 136.232 | 100.518 |
| NM_006079 CITED2    | 119.004 | 212.961 | 157.37  | 189.635 |
| NM_006835 CCNI      | 143.07  | 178.764 | 125.898 | 122.337 |
| NM_006289 TLN1      | 184.504 | 188.459 | 178.476 | 155.49  |
| NM_001961 EEF2      | 1850.65 | 2306.03 | 1591.65 | 1292.78 |
| NM_006793 PRDX3     | 142.59  | 110.501 | 86.5367 | 62.7386 |
| NM_006816 LMAN2     | 163.998 | 117.633 | 113.869 | 81.2245 |
| NM_021158 TRIB3     | 7.81926 | 36.2799 | 62.3804 | 179.542 |
| NM_005067 SIAH2     | 46.9368 | 72.3591 | 87.4301 | 146.843 |
| NM_004396 DDX5      | 186.33  | 170.52  | 165.401 | 135.775 |
| NM_005176 ATP5G2    | 299.211 | 256.604 | 191.883 | 136.662 |
| NM_033416 IMP4      | 163.847 | 96.7804 | 90.8493 | 58.3489 |
| NM_018955 UBB       | 1270.54 | 1485.28 | 1587.16 | 2296.42 |
| NM_002138 HNRNPD    | 174.535 | 102.369 | 129.595 | 64.9528 |
| NM_053275 RPLP0     | 1092.73 | 1518.34 | 1223.94 | 973.556 |
| NM_016612 SLC25A37  | 62.3493 | 636.517 | 1010.56 | 1531.48 |
| NM_033518 SLC38A5   | 145.497 | 121.632 | 150.904 | 122.259 |
| NM_001012 U2AF2     | 150.398 | 111.089 | 109.935 | 80.3966 |
| NM_199054 MKNK2     | 43.4479 | 143.091 | 173.389 | 195.95  |
| NM_001130 AES       | 181.632 | 206.623 | 211.796 | 172.283 |
| NM_004046 ATP5A1    | 507.055 | 418.145 | 357.006 | 264.194 |
| NM_022152 TMBIM1    | 96.7722 | 179.6   | 204.472 | 200.796 |
| NM_001667 ARL2      | 162.443 | 136.045 | 115.155 | 86.8617 |
| NM_012479 YWHAG     | 138.91  | 105.021 | 89.8305 | 61.0802 |
| NM_004889 ATP5J2    | 135.758 | 77.3487 | 98.846  | 103.543 |
| NM_000374 UROD      | 271.697 | 427.104 | 518.531 | 530.394 |
| NM_005003 NDUFAB1   | 169.55  | 122.918 | 119.369 | 88.256  |
| NM_001163 LOC388588 | 85.1569 | 166.087 | 170.248 | 152.815 |
| NM_017828 COMMD4    | 124.35  | 128.567 | 146.178 | 115.674 |
| NM_007278 GABARAP   | 126.268 | 152.516 | 167.567 | 237.578 |

|           |          |         |         |         |         |
|-----------|----------|---------|---------|---------|---------|
| NM_001069 | TUBB2A   | 102.184 | 168.11  | 226.13  | 221.357 |
| NM_033643 | RPL36    | 1825.23 | 2091.43 | 1517.96 | 1154.79 |
| NR_030321 | MIR590   | 69.5396 | 143.111 | 0       | 71.664  |
| NM_145008 | YPEL4    | 4.74199 | 55.2163 | 83.3941 | 143.83  |
| NR_030366 | MIR636   | 155.819 | 339.816 | 11.1711 | 287.515 |
| NM_015140 | TTLL12   | 161.077 | 142.797 | 140.513 | 94.1673 |
| NM_003123 | SPN      | 209.947 | 185.442 | 134.125 | 80.9699 |
| NM_000420 | KEL      | 52.5544 | 118.1   | 141.29  | 142.02  |
| NM_005573 | LMNB1    | 134.05  | 87.4626 | 83.045  | 59.7512 |
| NR_000018 | SNORD35A | 544.863 | 0       | 1008.71 | 0       |
| NM_001001 | ATP5D    | 211.089 | 171.687 | 163.855 | 113.987 |
| NM_032272 | MAF1     | 110.844 | 123.059 | 131.178 | 153.501 |
| NM_033546 | MYL12B   | 162.981 | 148.546 | 138.997 | 130.845 |
| NM_002444 | MSN      | 266.605 | 159.499 | 110.764 | 56.9905 |
| NM_001037 | EIF3B    | 136.445 | 118.24  | 94.4423 | 68.6708 |
| NM_001009 | RPS5     | 1330.1  | 1587.79 | 1206.15 | 1030.72 |
| NR_029677 | MIR135A1 | 0       | 280.527 | 0       | 0       |
| NM_004793 | LONP1    | 114.438 | 185.345 | 155.225 | 154.11  |
| NM_003134 | SRP14    | 153.716 | 144.025 | 136.345 | 104.114 |
| NR_030352 | MIR621   | 148     | 0       | 0       | 0       |
| NR_039600 | MIR550A3 | 0       | 184.04  | 0       | 0       |
| NM_000972 | RPL7A    | 580.405 | 553.279 | 455.946 | 347.479 |
| NM_015161 | ARL6IP1  | 104.22  | 127.334 | 142.628 | 143.714 |
| NM_004965 | HMGN1    | 166.612 | 108.806 | 96.5413 | 61.0188 |
| NM_014047 | C19orf53 | 138.946 | 118.408 | 105.167 | 82.1848 |
| NM_013402 | FADS1    | 112.357 | 146.651 | 86.7505 | 64.6241 |
| NM_019058 | DDIT4    | 35.0186 | 370.796 | 384.317 | 670.767 |
| NM_000419 | ITGA2B   | 165.718 | 105.108 | 37.0219 | 16.8017 |
| NM_005216 | DDOST    | 218.025 | 131.847 | 110.587 | 75.6521 |
| NM_002778 | PSAP     | 249.834 | 290.74  | 238.608 | 239.775 |
| NM_002070 | GNAI2    | 210.981 | 158.427 | 109.286 | 72.8367 |
| NM_004104 | FASN     | 278.454 | 541.148 | 266.91  | 132.804 |
| NM_001398 | ECH1     | 194.613 | 268.434 | 160.713 | 104.101 |
| NR_027697 | FLJ39653 | 113.5   | 160.562 | 125.057 | 98.4572 |
| NM_004905 | PRDX6    | 137.412 | 140.108 | 134.778 | 111.061 |
| NM_005053 | RAD23A   | 89.0436 | 206.64  | 280.612 | 313.188 |
| NM_004515 | ILF2     | 281.221 | 176.748 | 176.319 | 129.263 |
| NM_005066 | SFPQ     | 242.246 | 190.449 | 183.606 | 131.265 |
| NM_001344 | DAD1     | 207.446 | 165.874 | 128.204 | 94.229  |
| NM_001010 | RPS6     | 2117.64 | 2451.33 | 1795.65 | 1371.89 |
| NM_001903 | CTNNA1   | 80.4415 | 134.192 | 119.012 | 129.615 |
| NM_001134 | TOMM6    | 199.929 | 144.262 | 134.832 | 97.4916 |

|                     |         |         |         |         |
|---------------------|---------|---------|---------|---------|
| NM_014394 GHITM     | 118.001 | 118.876 | 128.186 | 155.599 |
| NM_025029 MZT2B     | 198.969 | 212.075 | 174.753 | 132.736 |
| NM_012111 AHSA1     | 157.46  | 104.764 | 105.483 | 80.5617 |
| NM_002786 PSMA1     | 129.418 | 104.551 | 97.1793 | 76.7791 |
| NM_005561 LAMP1     | 203.813 | 130.842 | 146.206 | 119.463 |
| NM_001697 ATP5O     | 237.794 | 233.668 | 192.088 | 154.812 |
| NM_005517 HMGN2     | 191.064 | 160.263 | 161.131 | 129.937 |
| NM_004146 NDUFB7    | 243.179 | 220.868 | 220.824 | 162.64  |
| NM_080748 ROMO1     | 161.205 | 148.361 | 137.572 | 102.836 |
| NM_001198 NME2      | 137.134 | 138.548 | 86.5966 | 26.1352 |
| NM_002961 S100A4    | 1284.99 | 1369.74 | 1225.12 | 833.105 |
| NM_001863 COX6B1    | 349.491 | 281.546 | 279.443 | 219.262 |
| NR_029674 MIR132    | 0       | 0       | 282.113 | 0       |
| NM_000992 RPL29     | 1645.44 | 1781.64 | 1331.44 | 1059.73 |
| NM_001023 RPS20     | 852.074 | 977.318 | 713.5   | 552.146 |
| NM_007209 RPL35     | 1111.36 | 1249.21 | 1064.13 | 783.401 |
| NM_000884 IMPDH2    | 326.141 | 325.875 | 209.607 | 143.032 |
| NM_016311 ATP1F1    | 229.871 | 279.112 | 276.037 | 225.569 |
| NM_001972 ELANE     | 237.879 | 52.7307 | 11.3783 | 8.22841 |
| NM_013387 UQCR10    | 139.483 | 108.041 | 115.573 | 90.148  |
| NM_002137 HNRNPA2B1 | 397.301 | 295.211 | 292.491 | 216.298 |
| NM_001014 RPS10     | 437.666 | 430.13  | 322.57  | 256.106 |
| NM_012336 NARF      | 75.1895 | 158.142 | 161.206 | 226.364 |
| NR_002736 SNORD60   | 3533.89 | 0       | 0       | 0       |
| NM_001833 CLTA      | 191.553 | 142.955 | 137.871 | 109.672 |
| NM_002799 PSMB7     | 206.562 | 192.921 | 182.658 | 159.145 |
| NM_002266 KPNA2     | 178.927 | 129.396 | 132.429 | 107.716 |
| NM_002872 RAC2      | 305.285 | 402.651 | 271.533 | 172.633 |
| NM_138689 PPP1R14B  | 132.655 | 97.6841 | 93.4487 | 57.0605 |
| NM_001025 RPS23     | 178.849 | 227.845 | 162.654 | 115.238 |
| NM_003089 SNRNP70   | 225.73  | 180.097 | 171.488 | 110.033 |
| NM_001828 CLC       | 930.489 | 216.291 | 78.2798 | 26.5777 |
| NM_005165 ALDOC     | 38.2522 | 292.159 | 74.1977 | 49.5903 |
| NM_016732 RALY      | 146.123 | 138.268 | 141.341 | 131.989 |
| NM_003486 SLC7A5    | 98.7942 | 185.957 | 289.767 | 409.309 |
| NM_030802 FAM117A   | 46.6427 | 180.808 | 219.584 | 244.76  |
| NM_007100 ATP5I     | 438.47  | 325.63  | 341.551 | 247.853 |
| NM_003650 CST7      | 130.676 | 41.6789 | 19.9975 | 6.14965 |
| NM_023936 MRPS34    | 226.323 | 148.691 | 150.56  | 96.5601 |
| NM_080426 GNAS      | 250.481 | 273.522 | 202.63  | 182.686 |
| NM_005030 PLK1      | 132.064 | 131.558 | 135.253 | 115.317 |
| NM_007263 COPE      | 248.338 | 206.176 | 212.852 | 181.812 |

|           |          |         |         |         |         |
|-----------|----------|---------|---------|---------|---------|
| NM_001749 | CAPNS1   | 211     | 157.148 | 119.102 | 83.304  |
| NM_002668 | PLP2     | 164.948 | 107.832 | 71.2221 | 39.086  |
| NM_003750 | EIF3A    | 170.871 | 129.9   | 118.706 | 81.8909 |
| NM_003564 | TAGLN2   | 510.191 | 472.706 | 321.158 | 213.9   |
| NM_175614 | NDUFA11  | 174.041 | 153.815 | 162.266 | 139.52  |
| NM_001136 | CCDC124  | 153.026 | 112.62  | 130.093 | 92.9925 |
| NM_019107 | C19orf10 | 145.727 | 77.2335 | 61.5811 | 44.3436 |
| NR_003038 | SNHG5    | 269.688 | 229.945 | 154.163 | 91.0919 |
| NM_005782 | THOC4    | 287.341 | 222.385 | 229.145 | 166.928 |
| NM_000969 | RPL5     | 711.329 | 780.654 | 506.924 | 367.808 |
| NM_007111 | TFDP1    | 103.838 | 153.775 | 169.526 | 164.721 |
| NM_004134 | HSPA9    | 155.402 | 110.71  | 99.5651 | 88.8278 |
| NM_001008 | C7orf59  | 130.493 | 99.5702 | 96.4068 | 74.8994 |
| NM_001640 | APEH     | 154.17  | 130.427 | 153.882 | 116.594 |
| NM_024038 | C19orf43 | 208.447 | 229.754 | 202.507 | 158.345 |
| NM_001960 | EEF1D    | 104.087 | 184.182 | 161.901 | 144.231 |
| NM_001204 | EIF4A1   | 263.076 | 148.12  | 169.791 | 128.317 |
| NM_001030 | RPS15A   | 174.73  | 221.774 | 144.928 | 156.812 |
| NM_000454 | SOD1     | 326.578 | 278.135 | 247.173 | 227.402 |
| NM_006432 | NPC2     | 109.309 | 173.163 | 103.562 | 74.7193 |
| NM_014164 | FXVD5    | 237.309 | 135.237 | 89.4366 | 45.8009 |
| NM_002305 | LGALS1   | 263.267 | 209.129 | 74.2193 | 45.8969 |
| NM_000365 | TPI1     | 474.253 | 823.64  | 359.289 | 277.19  |
| NM_005984 | SLC25A1  | 123.461 | 141.235 | 100.84  | 70.513  |
| NM_000714 | TSPO     | 200.409 | 234.646 | 177.474 | 130.164 |
| NM_018645 | HES6     | 116.898 | 614.471 | 509.714 | 486.698 |
| NM_002101 | GYPC     | 330.163 | 752.713 | 1058.09 | 1172.44 |
| NM_001152 | SLC25A5  | 429.63  | 416.934 | 350.79  | 262.149 |
| NM_005916 | MCM7     | 368.372 | 342.615 | 345.552 | 292.877 |
| NM_017491 | WDR1     | 176.853 | 116.63  | 99.0602 | 73.6621 |
| NM_006761 | YWHAE    | 226.834 | 195.043 | 178.293 | 142.004 |
| NM_006088 | TUBB2C   | 742.392 | 760.636 | 854.972 | 658.893 |
| NM_002948 | RPL15    | 563.589 | 561.929 | 404.891 | 317.452 |
| NM_006877 | GMPR     | 92.0922 | 157.241 | 161.014 | 181.817 |
| NM_001114 | EPB42    | 29.5623 | 196.899 | 287.08  | 372.291 |
| NM_015049 | TRAK2    | 10.9609 | 44.7821 | 78.6082 | 129.332 |
| NM_015201 | BOP1     | 131.222 | 84.1753 | 96.5643 | 61.1335 |
| NM_002156 | HSPD1    | 213.31  | 122.898 | 114.101 | 82.7261 |
| NM_005801 | EIF1     | 253.499 | 504.969 | 409.96  | 534.616 |
| NM_001006 | RPS3A    | 526.314 | 554.7   | 407.461 | 305.457 |
| NM_002306 | LGALS3   | 36.2724 | 118.32  | 157.016 | 185.203 |
| NM_007103 | NDUFV1   | 162.632 | 150.252 | 134.014 | 94.8492 |

|           |         |         |         |         |         |
|-----------|---------|---------|---------|---------|---------|
| NM_014502 | PRPF19  | 223.163 | 141.55  | 144.09  | 98.5673 |
| NM_002949 | MRPL12  | 176.756 | 105.016 | 113.21  | 68.6803 |
| NM_002496 | NDUFS8  | 212.239 | 183.816 | 215.022 | 161.388 |
| NM_000976 | RPL12   | 136.517 | 116.092 | 118.522 | 107.18  |
| NM_001079 | DBI     | 216.682 | 107.373 | 74.4954 | 45.8308 |
| NM_005347 | HSPA5   | 162.374 | 87.3498 | 96.0991 | 123.452 |
| NM_002229 | JUNB    | 34.217  | 217.131 | 161.121 | 195.699 |
| NM_030928 | CDT1    | 106.89  | 178.947 | 127.761 | 113.039 |
| NM_178014 | TUBB    | 1459.66 | 1310.96 | 1428.66 | 1104.61 |
| NM_005507 | CFL1    | 1021.72 | 574.961 | 535.139 | 361.495 |
| NM_015710 | GLTSCR2 | 161.797 | 217.859 | 152.028 | 110.599 |
| NM_001122 | PLIN2   | 95.4541 | 351.668 | 130.009 | 121.684 |
| NM_006826 | YWHAQ   | 188.728 | 150.693 | 144.376 | 112.084 |
| NM_002231 | CD82    | 188.628 | 178.692 | 175.776 | 138.967 |
| NM_032525 | TUBB6   | 125.473 | 178.276 | 183.472 | 150.905 |
| NM_024164 | TPSB2   | 101.661 | 216.106 | 292.115 | 178.879 |
| NR_036137 | MIR3176 | 458.968 | 0       | 0       | 0       |
| NM_002728 | PRG2    | 686.175 | 702.04  | 301.76  | 223.575 |
| NM_001003 | RPLP1   | 158.716 | 334.341 | 116.934 | 141.367 |
| NM_002798 | PSMB6   | 203.621 | 170.704 | 193.789 | 157.636 |
| NR_029683 | MIR142  | 0       | 712.471 | 0       | 0       |
| NM_004897 | MINPP1  | 61.2539 | 152.237 | 151.558 | 131.954 |
| NM_014585 | SLC40A1 | 132.228 | 150.467 | 104.013 | 121.182 |
| NM_016404 | TRMT112 | 203.873 | 187.66  | 189.409 | 150.65  |
| NM_000298 | PKLR    | 146.463 | 325.485 | 245.584 | 181.857 |
| NM_001127 | CD36    | 92.0366 | 221.21  | 173.726 | 157.968 |
| NM_001694 | ATP6VOC | 187.144 | 217.236 | 284.874 | 307.335 |
| NM_001016 | RPS12   | 929.515 | 1466.6  | 1044.2  | 905.194 |
| NM_006431 | CCT2    | 250.579 | 212.576 | 208.644 | 167.41  |
| NM_006445 | PRPF8   | 198.177 | 149.223 | 148.911 | 125.123 |
| NM_002809 | PSMD3   | 174.328 | 131.328 | 144.426 | 122.288 |
| NM_005891 | ACAT2   | 166.513 | 164.156 | 103.539 | 66.417  |
| NM_007158 | CSDE1   | 133.802 | 112.191 | 93.9411 | 78.9757 |
| NM_002473 | MYH9    | 186.972 | 170.965 | 145.652 | 107.678 |
| NM_014225 | PPP2R1A | 147.802 | 119.906 | 97.4287 | 71.6473 |
| NM_014931 | PPP6R1  | 174.943 | 112.364 | 111.891 | 94.4879 |
| NM_005968 | HNRNPM  | 168.833 | 110.952 | 125.812 | 94.1985 |
| NM_001136 | RPL28   | 306.553 | 95.8246 | 158.796 | 142.465 |
| NM_004074 | COX8A   | 502.74  | 515.268 | 518.26  | 444.698 |
| NM_017436 | A4GALT  | 64.8106 | 125.857 | 128.912 | 104.179 |
| NM_001686 | ATP5B   | 704.98  | 554.956 | 504.882 | 392.377 |
| NM_002168 | IDH2    | 230.48  | 334.134 | 339.594 | 274.378 |

|                      |         |         |         |          |
|----------------------|---------|---------|---------|----------|
| NM_001033(GLUL       | 207.32  | 313.083 | 151.54  | 114.725  |
| NM_003746 DYNLL1     | 235.135 | 154.415 | 175.91  | 171.027  |
| NM_000980 RPL18A     | 557.378 | 573.104 | 485.746 | 403.153  |
| NM_004355 CD74       | 386.778 | 45.2701 | 10.5219 | 3.3911   |
| NM_001469 XRCC6      | 225.276 | 152.12  | 145.157 | 115.717  |
| NM_199185 NPM1       | 479.906 | 326.272 | 278.206 | 160.931  |
| NM_017907 LAMTOR1    | 187.251 | 140.215 | 117.964 | 106.813  |
| NM_004960 FUS        | 138.213 | 83.8482 | 94.5073 | 64.5862  |
| NM_019111 HLA-DRA    | 161.703 | 12.5472 | 1.67822 | 0.559082 |
| NM_001048:UBL5       | 135.353 | 108.912 | 110.721 | 96.225   |
| NM_000175 GPI        | 176.858 | 366.647 | 115.686 | 92.11    |
| NM_001780 CD63       | 316.843 | 190.329 | 139.165 | 67.8392  |
| NM_006600 NUDC       | 145.188 | 84.9215 | 95.0523 | 59.8467  |
| NM_199250 C19orf48   | 212.24  | 213.964 | 186.701 | 132.74   |
| NM_000031 ALAD       | 72.3336 | 203.539 | 215.285 | 218.641  |
| NM_031266 HNRNPAB    | 302.363 | 303.341 | 263.984 | 174.458  |
| NM_006428 MRPL28     | 120.785 | 127.412 | 137.621 | 109.405  |
| NM_001425 EMP3       | 345.22  | 274.986 | 242.223 | 131.626  |
| NM_002100 GYPB       | 6.03336 | 198.047 | 313.21  | 374.318  |
| NM_003365 UQCRC1     | 240.455 | 221.9   | 196.649 | 145.346  |
| NM_052850 GADD45GIP1 | 226.157 | 224.028 | 225.295 | 154.073  |
| NM_004111 FEN1       | 141.516 | 123.206 | 127.334 | 103.811  |
| NM_001033:UBA52      | 131.877 | 169.902 | 133.62  | 117.243  |
| NM_005729 PPIF       | 161.117 | 86.016  | 59.3653 | 34.1092  |
| NM_172057 KCNH2      | 132.142 | 206.467 | 219.062 | 157.391  |
| NM_006585 CCT8       | 144.24  | 120.11  | 87.3051 | 61.6161  |
| NR_039891 MIR3064    | 0       | 1650.51 | 0       | 0        |
| NM_003227 TFR2       | 116.192 | 149.787 | 133.603 | 115.132  |
| NM_001007 RPS4X      | 708.554 | 681.016 | 495.995 | 390.859  |
| NM_000347 SPTB       | 75.3154 | 303.779 | 422.448 | 415.651  |
| NR_001589 HBBP1      | 35.0481 | 640.479 | 608.558 | 660.908  |
| NM_014390 SND1       | 156.666 | 111.985 | 84.1444 | 68.1904  |
| NM_012321 LSM4       | 184.27  | 146.842 | 145.986 | 106.574  |
| NM_006098 GNB2L1     | 2063.65 | 2249.49 | 1506.5  | 1183.29  |
| NM_006360 EIF3M      | 183.925 | 153.599 | 110.884 | 76.745   |
| NR_031706 MIR1306    | 0       | 0       | 365.984 | 0        |
| NM_002934 RNASE2     | 250.807 | 95.391  | 22.9466 | 7.73241  |
| NM_001177:RPS27A     | 304.543 | 263.289 | 215.134 | 180.293  |
| NM_001005 RPS3       | 1615.95 | 2144.2  | 1545.32 | 1253.24  |
| NM_000967 RPL3       | 1426.97 | 1675.93 | 1159.1  | 902.145  |
| NM_006184 NUCB1      | 111.874 | 155.45  | 147.612 | 157.948  |
| NM_002300 LDHB       | 812.491 | 574.091 | 419.41  | 254.755  |

|                      |         |         |         |         |
|----------------------|---------|---------|---------|---------|
| NM_004461 FARSA      | 171.174 | 121.419 | 122.145 | 81.6522 |
| NM_003189 TAL1       | 69.0845 | 118.963 | 141.004 | 170.114 |
| NR_024373 LOC541471  | 116.902 | 192.279 | 130.728 | 104.762 |
| NM_138578 BCL2L1     | 76.2485 | 108.212 | 168.615 | 292.993 |
| NM_032704 TUBA1C     | 953.794 | 901.749 | 909.893 | 799.94  |
| NM_005186 CAPN1      | 138.436 | 133.942 | 135.497 | 118.193 |
| NM_002893 RBBP7      | 152.419 | 125.174 | 111.025 | 84.981  |
| NM_004596 SNRPA      | 137.058 | 141.47  | 120.548 | 88.3235 |
| NM_002792 PSMA7      | 334.197 | 236.899 | 279.097 | 228.15  |
| NM_003217 TMBIM6     | 185.944 | 176.49  | 144.729 | 135.486 |
| NM_001070 TUBG1      | 63.8313 | 141.611 | 120.447 | 112.337 |
| NM_006601 PTGES3     | 136.969 | 123.371 | 105.678 | 89.8679 |
| NM_001142: APLP2     | 68.5072 | 128.813 | 103.919 | 90.3292 |
| NM_001207 BTF3       | 317.233 | 302.66  | 237.003 | 203.164 |
| NM_004077 CS         | 130.079 | 96.4987 | 89.2124 | 65.9887 |
| NM_006513 SARS       | 95.0407 | 122.183 | 121.646 | 139.187 |
| NR_036263_ MIR1244-3 | 3953.17 | 4440.81 | 2681.68 | 1214.69 |
| NM_181697 PRDX1      | 226.524 | 125.013 | 116.182 | 90.0611 |
| NM_006819 STIP1      | 142.231 | 94.3956 | 101.72  | 77.3812 |
| NM_001134: NT5DC2    | 153.378 | 99.0613 | 83.4323 | 49.4797 |
| NM_002796 PSMB4      | 343.812 | 295.247 | 312.028 | 290.11  |
| NM_016462 TMEM14C    | 73.0671 | 192.743 | 149.101 | 148.999 |
| NM_000067 CA2        | 136.091 | 453.566 | 181.763 | 116.518 |
| NM_001636 SLC25A6    | 350.787 | 429.115 | 324.042 | 243.128 |
| NM_002097 GTF3A      | 176.504 | 102.979 | 104.359 | 68.6478 |
| NM_007355 HSP90AB1   | 719.782 | 518.061 | 430.569 | 297.268 |
| NM_003126 SPTA1      | 92.1001 | 200.876 | 266.801 | 270.606 |
| noNM_0204: ANK1      | 44.7858 | 107.333 | 111.748 | 139.286 |
| NM_031471 FERMT3     | 134.709 | 137.525 | 130.521 | 107.671 |
| NM_001658 ARF1       | 305.34  | 263.283 | 269.705 | 306.988 |
| NM_005998 CCT3       | 309.33  | 208.865 | 210.968 | 157.098 |
| NM_001242: TMCC2     | 1.33353 | 9.49146 | 88.1079 | 261.392 |
| NM_001013: SLC3A2    | 64.7652 | 158.611 | 190.898 | 230.537 |
| NM_004541 NDUFA1     | 208.097 | 150.222 | 138.931 | 108.276 |
| NM_000979 RPL18      | 1932.78 | 2478    | 1817.75 | 1360    |
| NM_012478 WBP2       | 52.5983 | 124.086 | 111.741 | 157.112 |
| NM_000994 RPL32      | 235.151 | 270.292 | 199.352 | 167.213 |
| NM_003299 HSP90B1    | 170.173 | 100.586 | 74.0886 | 48.7375 |
| NM_005381 NCL        | 817.951 | 486.766 | 432.002 | 240.272 |
| NM_004095 EIF4EBP1   | 176.254 | 120.837 | 112.737 | 81.9722 |
| NM_000099 CST3       | 212.445 | 197.57  | 157.104 | 79.074  |
| NM_005720 ARPC1B     | 251.886 | 133.17  | 105.014 | 57.4318 |



|           |            |         |         |         |         |
|-----------|------------|---------|---------|---------|---------|
| NM_003145 | SSR2       | 213.322 | 137.689 | 96.9222 | 71.8723 |
| NM_001136 | ISOC2      | 132.044 | 98.3601 | 83.5191 | 52.7789 |
| NM_002102 | GYPE       | 4.93341 | 97.1801 | 145.417 | 196.916 |
| NM_004356 | CD81       | 135.53  | 80.8301 | 43.8415 | 22.2398 |
| NM_003752 | EIF3C      | 300.409 | 221.09  | 201.975 | 152.545 |
| NM_001664 | RHOA       | 314.139 | 235.652 | 190.623 | 146.826 |
| NR_028272 | NEAT1      | 161.233 | 340.088 | 437.79  | 449.518 |
| NM_001273 | CHD4       | 137.241 | 94.7778 | 76.9615 | 52.0805 |
| NM_004526 | MCM2       | 245.45  | 228.793 | 234.738 | 198.145 |
| NM_006597 | HSPA8      | 1009.79 | 697.189 | 703.24  | 459.151 |
| NM_001145 | SLC1A5     | 47.811  | 105.562 | 114.325 | 163.287 |
| NM_006026 | H1FX       | 155.295 | 354.845 | 414.185 | 519.302 |
| NM_006304 | SHFM1      | 173.874 | 154.671 | 141.804 | 93.4387 |
| NM_031444 | C22orf13   | 95.0304 | 139.677 | 140.822 | 131.531 |
| NM_001089 | UQCRHL     | 354.691 | 334.159 | 243.485 | 167.039 |
| NM_001022 | RPS19      | 633.386 | 786.521 | 586.153 | 516.306 |
| NM_182746 | MCM4       | 154.489 | 140.033 | 142.599 | 107.324 |
| NM_018509 | LRRC59     | 182.444 | 107.813 | 122.075 | 82.2497 |
| NM_002466 | MYBL2      | 172.099 | 262.601 | 281.313 | 244.147 |
| NM_004188 | GFI1B      | 212.52  | 421.923 | 410.838 | 389.793 |
| NM_000532 | PCCB       | 108.118 | 135.76  | 107.942 | 85.1681 |
| NM_003685 | KHSRP      | 138.143 | 110.077 | 106.304 | 74.0261 |
| NM_001017 | RPS13      | 327.003 | 272.318 | 233.77  | 183.765 |
| NM_005583 | LYL1       | 162.772 | 150.884 | 168     | 155.168 |
| NM_017510 | TMED9      | 172.141 | 108.077 | 92.4159 | 62.8497 |
| NM_079423 | MYL6       | 399.223 | 455.245 | 355.358 | 330.405 |
| NM_001012 | RPSA       | 654.819 | 674.577 | 556.55  | 468.772 |
| NM_000852 | GSTP1      | 282.801 | 136.163 | 80.3646 | 47.0801 |
| NM_001436 | FBL        | 515.179 | 431.304 | 327.591 | 210.428 |
| NM_004265 | FADS2      | 610.506 | 769.393 | 510.636 | 313.335 |
| NR_003319 | SNORD116-4 | 156.472 | 0       | 0       | 0       |
| NM_002166 | ID2        | 45.2971 | 174.907 | 105.182 | 93.1733 |
| NM_005762 | TRIM28     | 543.973 | 413.831 | 348.79  | 247.077 |
| NM_001136 | RCC2       | 158.256 | 95.9776 | 87.5666 | 66.8248 |
| NM_000184 | HBG2       | 371.78  | 6068.49 | 12460.5 | 21016.2 |
| NM_003795 | SNX3       | 106.274 | 133.564 | 122.053 | 108.225 |
| NR_030754 | MIR622     | 207.888 | 0       | 111.011 | 0       |
| NM_000687 | AHCY       | 247.498 | 170.21  | 121.877 | 72.8752 |
| NM_016091 | EIF3L      | 280.826 | 313.607 | 217.276 | 181.706 |
| NM_030979 | PABPC3     | 208.647 | 164.078 | 159.502 | 141.408 |
| NM_013442 | STOML2     | 201.118 | 157.392 | 155.102 | 120.341 |
| NM_001964 | EGR1       | 8.47301 | 142.693 | 20.7652 | 33.9646 |

|           |          |         |         |         |         |
|-----------|----------|---------|---------|---------|---------|
| NM_000026 | ADSL     | 131.453 | 102.506 | 87.6982 | 64.1812 |
| NM_002720 | PPP4C    | 128.81  | 119.444 | 118.159 | 94.2213 |
| NM_001003 | HBM      | 3.87837 | 598.501 | 1601.22 | 2222.26 |
| NM_016417 | GLRX5    | 139.64  | 246.672 | 361.783 | 441.166 |
| NR_029498 | MIR25    | 2051.06 | 0       | 0       | 0       |
| NM_001494 | GDI2     | 145.084 | 104.443 | 92.3386 | 69.8501 |
| NM_001665 | RHOG     | 224.091 | 192.55  | 151.728 | 111.538 |
| NM_000518 | HBB      | 7560.73 | 62095.6 | 103280  | 156087  |
| NM_001012 | RPS8     | 1215.13 | 1474.6  | 1149.49 | 883.322 |
| NM_006082 | TUBA1B   | 2032.42 | 2100.56 | 2082.7  | 1694.9  |
| NR_000006 | SNORD21  | 197.245 | 187.965 | 0       | 0       |
| NM_002049 | GATA1    | 223.042 | 281.744 | 296.644 | 267.088 |
| NR_000011 | SNORA70  | 162.937 | 154.395 | 87.287  | 86.2691 |
| NM_000968 | RPL4     | 606.028 | 669.872 | 554.285 | 444.726 |
| NM_006887 | ZFP36L2  | 242.766 | 200.631 | 124.691 | 83.4917 |
| NM_007065 | CDC37    | 198.539 | 170.534 | 167.878 | 116.708 |
| NM_017495 | RBM38    | 53.4966 | 164.659 | 274.473 | 503.1   |
| NM_001024 | RPS21    | 1056.36 | 1319.8  | 1152.96 | 1019.93 |
| NM_000937 | POLR2A   | 145.919 | 121.331 | 118.687 | 99.7312 |
| NM_001862 | COX5B    | 460.69  | 359.811 | 348.717 | 263.212 |
| NM_002539 | ODC1     | 255.846 | 168.353 | 192.753 | 165.108 |
| NM_006156 | NEDD8    | 190.936 | 148.423 | 142.375 | 116.744 |
| NM_002648 | PIM1     | 159.664 | 270.309 | 329.028 | 391.487 |
| NM_005809 | PRDX2    | 586.727 | 1704.09 | 2192.05 | 2299.47 |
| NM_014508 | APOBEC3C | 137.285 | 110.915 | 101.951 | 82.0526 |
| NM_000977 | RPL13    | 114.048 | 175.377 | 119.462 | 94.3128 |
| NM_016215 | EGFL7    | 121.114 | 214.936 | 61.3058 | 34.4043 |
| NM_000146 | FTL      | 1632.77 | 2187.78 | 1716.28 | 2345.69 |
| NM_016034 | MRPS2    | 136.135 | 112.342 | 88.7369 | 61.3502 |
| NM_030969 | TMEM14B  | 65.8879 | 138.354 | 117.822 | 108.567 |
| NM_015999 | ADIPOR1  | 42.9189 | 82.7092 | 103.407 | 153.807 |
| NM_032014 | MRPS24   | 186.136 | 186.797 | 150.749 | 106.482 |
| NR_003068 | SNORD88B | 282.979 | 0       | 33.0103 | 0       |
| NM_006435 | IFITM2   | 347.849 | 158.624 | 96.8434 | 44.6269 |
| NM_006013 | RPL10    | 387.698 | 365.171 | 292.721 | 233.986 |
| NM_152906 | C22orf25 | 63.0305 | 157.377 | 212.67  | 205.419 |
| NM_005184 | CALM3    | 319.777 | 391.402 | 371.663 | 283.389 |
| NM_001101 | ACTB     | 4636.77 | 3563.03 | 2940.36 | 2078.88 |
| NM_002626 | PFKL     | 132.845 | 194.16  | 113.225 | 82.3335 |
| NM_004475 | FLOT2    | 137.127 | 128.139 | 142.879 | 120.968 |
| NM_001195 | SRSF2    | 348.531 | 249.234 | 254.175 | 168.39  |
| NM_144564 | SLC39A3  | 174.898 | 123.576 | 106.228 | 75.9813 |

|           |           |         |         |         |         |
|-----------|-----------|---------|---------|---------|---------|
| NM_000978 | RPL23     | 396.115 | 412.977 | 285.154 | 208.485 |
| NM_001428 | ENO1      | 899.276 | 1058.45 | 484.222 | 324.995 |
| NM_006230 | POLD2     | 172.895 | 140.013 | 118.818 | 87.4825 |
| NM_002388 | MCM3      | 202.954 | 136.385 | 130.118 | 93.9638 |
| NM_016437 | TUBG2     | 41.734  | 157.334 | 96.9933 | 90.2566 |
| NM_002952 | RPS2      | 2296.35 | 2523.51 | 2035.81 | 1530.36 |
| NM_003146 | SSRP1     | 245.254 | 185.952 | 192.391 | 150.333 |
| NM_001199 | RPS17L    | 478.086 | 456.499 | 393.6   | 312.995 |
| NM_006430 | CCT4      | 150.888 | 122.415 | 109.101 | 81.8179 |
| NM_014413 | EIF2AK1   | 58.6554 | 117.298 | 125.29  | 150.335 |
| NM_199329 | SLC43A3   | 223.563 | 314.537 | 275.64  | 204.179 |
| NM_001135 | NDUFB11   | 182.186 | 172.737 | 155.296 | 124.424 |
| NM_004052 | BNIP3     | 12.5073 | 156.705 | 43.0699 | 52.2165 |
| NR_002305 | PDIA3P    | 177.581 | 83.4911 | 72.2012 | 48.8594 |
| NM_015965 | NDUFA13   | 504.262 | 413.736 | 408.793 | 296.357 |
| NR_036052 | MIR1244-1 | 3953.17 | 4440.81 | 2681.68 | 1214.69 |
| NM_002654 | PKM2      | 305.396 | 387.875 | 111.11  | 47.0767 |
| NM_032477 | MRPL41    | 137.4   | 94.6831 | 104.988 | 73.1494 |
| NM_003295 | TPT1      | 1408.7  | 1809.9  | 1541.86 | 1541.19 |
| NM_001025 | AP2M1     | 287.005 | 322.055 | 357.488 | 340.96  |
| NM_145861 | EDARADD   | 165.666 | 189.325 | 87.9707 | 60.0221 |
| NM_017838 | NHP2      | 132.562 | 73.5677 | 73.2851 | 53.7665 |
| NM_002032 | FTH1      | 1352.16 | 2525.09 | 2714.01 | 4108.2  |
| NM_003405 | YWHAH     | 130.399 | 189.779 | 182.492 | 160.298 |
| NM_001997 | FAU       | 594.608 | 643.257 | 591.665 | 516.96  |
| NR_036158 | MIR3190   | 0       | 0       | 0       | 18193.7 |
| NM_130787 | AP2A1     | 95.9403 | 176.652 | 223.711 | 233.861 |
| NM_003769 | SRSF9     | 186.981 | 130.797 | 111.776 | 75.9293 |
| NM_015190 | DNAJC9    | 133.148 | 174.22  | 176.272 | 153.314 |
| NM_005354 | JUND      | 91.1751 | 378.25  | 182.114 | 249.265 |
| NM_001001 | TOMM5     | 146.38  | 84.1888 | 90.8001 | 53.5955 |
| NM_000996 | RPL35A    | 1021.65 | 1279.45 | 863.258 | 692.959 |
| NM_013237 | PRELID1   | 195.903 | 128.352 | 126.11  | 89.4388 |
| NM_007273 | PHB2      | 293.314 | 218.627 | 199.615 | 151.516 |
| NM_000971 | RPL7      | 362.297 | 316.086 | 247.825 | 183.428 |
| NM_001099 | EHBP1L1   | 47.9332 | 116.412 | 141.599 | 133.658 |
| NM_000455 | STK11     | 49.5644 | 104.266 | 152.523 | 196.469 |
| NM_030758 | OSBP2     | 25.2427 | 84.3255 | 179.344 | 193.63  |
| NR_030386 | MIR663    | 2362.74 | 7885.45 | 4225.68 | 3845.42 |
| NR_026673 | RPL23P8   | 232.297 | 192.491 | 160.214 | 111.136 |
| NM_031286 | SH3BGRL3  | 231.062 | 140.523 | 178.768 | 137.161 |
| NM_002805 | PSMC5     | 174.273 | 134.646 | 155.67  | 121.7   |

|           |         |         |         |         |         |
|-----------|---------|---------|---------|---------|---------|
| NM_001212 | C1QBP   | 396.523 | 240.103 | 203.211 | 127.129 |
| NR_030296 | MIR570  | 180.341 | 384.23  | 26.3799 | 0       |
| NM_005804 | DDX39A  | 255.876 | 231.117 | 235.319 | 181.096 |
| NM_005004 | NDUFB8  | 218.096 | 214.598 | 201.389 | 141.566 |
| NM_198334 | GANAB   | 220.382 | 143.62  | 123.082 | 92.1582 |
| NM_001171 | UBXN6   | 45.1857 | 92.1158 | 121.546 | 149.722 |
| NM_004099 | STOM    | 67.9568 | 109.478 | 147.844 | 194.175 |
| NM_002629 | PGAM1   | 167.137 | 187.654 | 98.1262 | 64.7556 |
| NM_006196 | PCBP1   | 412.143 | 491.853 | 441.153 | 394.258 |
| NM_005326 | HAGH    | 31.1497 | 107.181 | 136.922 | 148.164 |
| NM_016286 | DCXR    | 132.448 | 97.1305 | 99.8159 | 90.1027 |
| NM_005742 | PDIA6   | 180.867 | 92.7277 | 67.5275 | 41.9861 |
| NM_030752 | TCP1    | 138.665 | 118.76  | 107.582 | 82.2605 |
| NM_012423 | RPL13A  | 603.972 | 653.81  | 438.031 | 333.82  |
| NM_021104 | RPL41   | 1915.08 | 2207.96 | 1582.36 | 1212.5  |
| NM_020169 | LXN     | 164.915 | 370.248 | 260.06  | 198.241 |
| NM_207013 | TCEB2   | 200.791 | 183.009 | 169.233 | 151.736 |
| NM_001123 | PARK7   | 265.592 | 183.129 | 182.663 | 121.943 |
| NM_001752 | CAT     | 223.887 | 323.896 | 325.266 | 330.015 |
| NM_030662 | MAP2K2  | 120.297 | 266.53  | 172.032 | 152.502 |
| NM_005514 | HLA-B   | 205.212 | 83.5399 | 30.2216 | 21.5607 |
| NM_002950 | RPN1    | 202.389 | 121.403 | 108.678 | 79.7156 |
| NM_006009 | TUBA1A  | 339.52  | 515.966 | 375.448 | 323.682 |
| NM_003753 | EIF3D   | 228.558 | 288.785 | 210.703 | 171.887 |
| NM_000250 | MPO     | 618.53  | 94.1107 | 14.104  | 8.14903 |
| NM_018648 | NOP10   | 328.417 | 250.598 | 233.931 | 181.432 |
| NM_000097 | CPOX    | 53.3871 | 252.69  | 236.441 | 236.001 |
| NM_001011 | RPS7    | 248.786 | 229.645 | 171.15  | 133.458 |
| NR_037425 | MIR3652 | 52.5176 | 141.047 | 63.1588 | 47.2825 |
| NM_004343 | CALR    | 1111.31 | 466.795 | 498.88  | 396.447 |
| NM_003380 | VIM     | 154.15  | 45.7419 | 9.36389 | 6.99242 |
| NM_014868 | RNF10   | 52.4175 | 68.2694 | 83.9066 | 132.714 |
| NM_006936 | SUMO3   | 124.51  | 138.172 | 123.558 | 97.6298 |
| NM_002812 | PSMD8   | 158.61  | 132.525 | 130.5   | 114.187 |
| NM_031901 | MRPS21  | 165.673 | 132.264 | 120.141 | 86.6522 |
| NM_002346 | LY6E    | 128.619 | 59.13   | 43.007  | 15.708  |
| NM_001145 | NONO    | 145.753 | 99.4018 | 73.1355 | 45.5091 |
| NM_004309 | ARHGDI4 | 281.468 | 117.588 | 125.385 | 84.1778 |
| NM_181575 | AUP1    | 134.46  | 104.007 | 99.3049 | 82.8414 |
| NM_003011 | SET     | 152.526 | 98.5315 | 91.9007 | 59.5703 |
| NM_182649 | PCNA    | 284.139 | 289.771 | 285.78  | 224.499 |
| NM_004832 | GSTO1   | 182.999 | 301.705 | 230.599 | 177.564 |

|                      |         |         |         |         |
|----------------------|---------|---------|---------|---------|
| NM_001142:LMO2       | 140.413 | 255.546 | 162.313 | 108.589 |
| NM_000324 RHAG       | 104.975 | 373.195 | 445.076 | 449.952 |
| NM_004542 NDUFA3     | 209.962 | 148.048 | 165.829 | 126.359 |
| NM_006762 LAPTM5     | 483.826 | 455.135 | 427.747 | 229.627 |
| NM_000998 RPL37A     | 1955.92 | 2129.57 | 1369.69 | 1079.79 |
| NR_026911 RPL21P28   | 188.599 | 204.628 | 164.623 | 129.297 |
| NM_001746 CANX       | 187.133 | 106.748 | 80.8503 | 56.4307 |
| NM_001916 CYC1       | 246.315 | 240.148 | 250.967 | 199.79  |
| NM_004331 BNIP3L     | 39.073  | 161.077 | 95.7689 | 120.437 |
| NM_005566 LDHA       | 220.204 | 350.158 | 111.625 | 96.3974 |
| NM_013379 DPP7       | 131.285 | 105.714 | 82.5027 | 51.2447 |
| NM_017971 MRPL20     | 169.885 | 128.792 | 139.892 | 107.609 |
| NM_005063 SCD        | 209.378 | 546.779 | 223.476 | 159.83  |
| NM_002298 LCP1       | 206.667 | 100.787 | 58.1083 | 30.6756 |
| NR_036694 HSP90AB3P  | 306.728 | 205.725 | 173.711 | 121.024 |
| NM_197978 HEMGN      | 14.2645 | 195.366 | 253.962 | 270.033 |
| NR_004380 SNORD104   | 53244.5 | 0       | 0       | 0       |
| NR_039969 MIR5047    | 174.509 | 546.333 | 83.4292 | 147.818 |
| NM_001114:EPB49      | 53.1529 | 115.593 | 207.67  | 246.619 |
| NM_001159:GUK1       | 60.6283 | 135.269 | 207.805 | 294.749 |
| NM_020485 RHCE       | 12.377  | 145.104 | 184.451 | 207.794 |
| NM_000100 CSTB       | 177.52  | 191.131 | 166.968 | 141.4   |
| NM_014325 CORO1C     | 109.282 | 152.49  | 116.744 | 90.2351 |
| NM_000018 ACADVL     | 108.076 | 141.523 | 106.739 | 77.0089 |
| NM_018838 NDUFA12    | 172.789 | 113.108 | 106.558 | 85.1733 |
| NM_002436 MPP1       | 164.832 | 316.314 | 227.191 | 232.562 |
| NM_002568 PABPC1     | 419.685 | 381.517 | 364     | 328.06  |
| NM_001024:SLC6A9     | 5.55313 | 55.2688 | 125.64  | 186.223 |
| NR_002599 SNHG6      | 122.779 | 128.921 | 92.878  | 65.2042 |
| NM_004552 NDUFS5     | 149.494 | 136.543 | 100.186 | 66.2963 |
| NM_015276 USP22      | 143.438 | 106.415 | 79.613  | 59.4787 |
| NM_022170 EIF4H      | 153.948 | 146.801 | 121.375 | 84.3463 |
| NM_001029 RPS26      | 314.983 | 293.888 | 237.917 | 188.349 |
| NM_001172:FAM178B    | 117.963 | 445.392 | 85.2931 | 37.9116 |
| NM_003132 SRM        | 341.478 | 136.901 | 154.82  | 84.0632 |
| NM_004175 SNRPD3     | 174.011 | 119.579 | 112.641 | 82.0278 |
| NM_177983 PPM1G      | 190.674 | 147.535 | 144.871 | 102.31  |
| NM_000975 RPL11      | 1590.68 | 1536.24 | 1199.51 | 960.003 |
| NM_001985 ETFB       | 120.22  | 144.088 | 140.866 | 112.032 |
| NM_001003:NHP2L1     | 136.997 | 77.1219 | 76.5165 | 45.4566 |
| NR_003329 SNORD116-1 | 0       | 1131.82 | 0       | 0       |
| NM_001032 RPS29      | 261.016 | 627.348 | 317.662 | 161.699 |

|                      |         |         |         |         |
|----------------------|---------|---------|---------|---------|
| NM_012073 CCT5       | 169.892 | 107.681 | 109.864 | 75.3275 |
| NM_000973 RPL8       | 2073.75 | 2891.34 | 2199.18 | 1735.18 |
| NM_004462 FDFT1      | 183.472 | 230.989 | 139.788 | 117.499 |
| NM_021141 XRCC5      | 196.153 | 121.456 | 126.55  | 94.958  |
| NR_003098 SNHG1      | 153.21  | 133.596 | 125.898 | 91.5534 |
| NM_001320 CSNK2B     | 221.517 | 204.893 | 175.187 | 152.47  |
| NM_006755 TALDO1     | 405.139 | 323.374 | 351.495 | 381.566 |
| NR_027166 NCRNA00188 | 666.718 | 806.046 | 529.27  | 412.732 |
| NM_004048 B2M        | 619.806 | 321.676 | 206.157 | 161.496 |
| NM_001970 EIF5A      | 513.56  | 369.651 | 361.489 | 227.567 |
| NM_013234 EIF3K      | 332.748 | 298.564 | 288.783 | 234.671 |
| NR_039783_MIR4640    | 0       | 0       | 0       | 0       |
| NR_002819 MALAT1     | 147.724 | 244.42  | 207.744 | 231.629 |
| NM_000519 HBD        | 1190    | 2894.68 | 3491.73 | 4164.79 |
| NM_003091 SNRPB      | 333.444 | 255.223 | 245.068 | 165.435 |
| NM_018434 RNF130     | 177.697 | 120.753 | 63.6438 | 31.5276 |
| NM_002415 MIF        | 1945.05 | 1221.73 | 588.348 | 313.786 |
| NM_002068 GNA15      | 109.75  | 155.873 | 47.7669 | 26.4026 |
| NM_001866 COX7B      | 471.709 | 367.415 | 374.745 | 285.687 |
| NM_005022 PFN1       | 1942.02 | 1395.24 | 1233.23 | 808.874 |
| NM_001042 TRAPPC5    | 119.026 | 138.493 | 138.875 | 135.208 |
| NM_182924 MICALL2    | 51.5142 | 130.11  | 102.004 | 82.4988 |
| NM_003893 LDB1       | 173.692 | 245.55  | 195.987 | 153.047 |
| NM_016068 FIS1       | 157.748 | 191.184 | 202.083 | 210.532 |
| NM_002140 HNRNPK     | 135.293 | 101.493 | 96.7633 | 91.4093 |
| NM_001010 RNF187     | 83.1716 | 109.398 | 126.326 | 157.063 |
| NM_016497 MRPL51     | 194.29  | 156.737 | 147.398 | 97.5428 |
| NR_037482 MIR3918    | 126.559 | 475.15  | 0       | 0       |
| NM_004990 MARS       | 118.114 | 113.959 | 140.325 | 138.106 |
| NM_080821 C20orf108  | 30.5941 | 100.897 | 135.202 | 143.173 |
| NM_004546 NDUFB2     | 163.165 | 96.8547 | 87.4829 | 62.336  |
| NM_033496 HK1        | 228.074 | 336.974 | 359.754 | 320.067 |
| NM_031210 SLIRP      | 260.566 | 166.056 | 163.534 | 103.376 |
| NM_001001 ATP5C1     | 193.269 | 147.461 | 113.704 | 82.0147 |
| NM_002074 GNB1       | 166.158 | 132.447 | 113.079 | 90.4832 |
| NM_000984 RPL23A     | 478.92  | 471.277 | 369.627 | 318.185 |
| NM_002804 PSMC3      | 152.926 | 131.656 | 141.619 | 119.591 |
| NM_000918 P4HB       | 480.444 | 376.916 | 231.58  | 190.573 |
| NM_002808 PSMD2      | 130.394 | 97.2067 | 121.615 | 109.541 |
| NM_004152 OAZ1       | 807.801 | 777.933 | 760.825 | 789.206 |
| NM_001861 COX4I1     | 449.519 | 420.116 | 366.833 | 306.501 |
| NM_001950 E2F4       | 142.686 | 174.934 | 231.921 | 208.429 |

|                     |         |         |         |         |
|---------------------|---------|---------|---------|---------|
| NM_001568 EIF3E     | 141.804 | 147.727 | 90.7204 | 62.9903 |
| NM_080598_DDX39B    | 139.809 | 117.688 | 93.8142 | 71.0493 |
| NM_002461 MVD       | 94.9185 | 220.459 | 107.235 | 68.9114 |
| NM_003792 EDF1      | 339.527 | 282.181 | 268.23  | 221.097 |
| NM_001096 ACLY      | 164.189 | 152.667 | 94.9216 | 58.6064 |
| NM_000993 RPL31     | 715.351 | 860.072 | 575.465 | 542.144 |
| NM_002099 GYP A     | 5.18728 | 107.94  | 160.875 | 165.659 |
| NM_002795 PSMB3     | 225.733 | 166.52  | 187.041 | 145.964 |
| NM_001098:HMGCS1    | 87.1402 | 148.571 | 68.627  | 34.6329 |
| NM_033161 SURF4     | 150.697 | 107.976 | 89.4882 | 70.5624 |
| NM_005594 NACA      | 185.125 | 165.958 | 135.507 | 108.504 |
| NM_014014 SNRNP200  | 134.652 | 136.316 | 120.386 | 98.1507 |
| NM_004494 HDGF      | 241.825 | 279.616 | 329.803 | 268.047 |
| NM_004117 FKBP5     | 253.347 | 176.546 | 60.0108 | 36.5613 |
| NM_001028 RPS25     | 633.201 | 561.269 | 412.226 | 341.687 |
| NM_000032 ALAS2     | 11.9693 | 340.74  | 626.82  | 947.197 |
| NM_002085 GPX4      | 359.457 | 271.159 | 205.559 | 156.822 |
| NR_039741 MIR4516   | 0       | 524.043 | 0       | 0       |
| NM_002951 RPN2      | 206.992 | 125.031 | 101.009 | 73.3034 |
| NM_021134 MRPL23    | 162.805 | 170.303 | 144.735 | 107.886 |
| NR_031576 MIR762    | 3893.73 | 0       | 0       | 0       |
| NM_002793 PSMB1     | 273.149 | 232.755 | 236.168 | 195.006 |
| NM_000075 CDK4      | 299.992 | 219.835 | 190.492 | 126.134 |
| NM_003329 TXN       | 147.528 | 116.279 | 95.2313 | 78.0732 |
| NM_198318 PRMT1     | 238.081 | 138.748 | 113.976 | 64.6583 |
| NR_036055 MIR2861   | 472.072 | 0       | 0       | 0       |
| NM_012473 TXN2      | 126.544 | 168.556 | 123.35  | 97.7888 |
| NM_001071 TYMS      | 275.04  | 244.888 | 238.399 | 175.896 |
| NM_139215 TAF15     | 192.471 | 136.115 | 139.524 | 87.7886 |
| NM_024299 PPDPF     | 214.927 | 332.086 | 415.385 | 435.917 |
| NR_037428 MIR3655   | 0       | 0       | 1264.76 | 1162.52 |
| NM_006739 MCM5      | 280.225 | 260.416 | 258.766 | 206.204 |
| NM_016039 C14orf166 | 138.696 | 103.732 | 98.1443 | 73.8271 |
| NM_001000 RPL39     | 882.581 | 959.194 | 665.941 | 515.486 |
| NM_003757 EIF3I     | 232.967 | 182.572 | 169.128 | 124.897 |
| NM_001005:SREBF1    | 44.3033 | 136.32  | 101.907 | 83.5493 |
| NM_000942 PPIB      | 496.966 | 211.333 | 149.408 | 100.522 |
| NM_001418 EIF4G2    | 249.665 | 155.724 | 149.332 | 119.341 |
| NM_002727 SRGN      | 741.903 | 172.34  | 56.9311 | 30.8736 |
| NM_021130 PPIA      | 480.144 | 403.158 | 327.797 | 252.588 |
| NM_005662 VDAC3     | 128.5   | 125.39  | 112.443 | 90.5374 |
| NM_005572 LMNA      | 332.783 | 506.842 | 529.933 | 381.67  |

|                    |         |         |         |         |
|--------------------|---------|---------|---------|---------|
| NM_003754 EIF3F    | 152.613 | 177.824 | 143.268 | 120.506 |
| NM_001134 OST4     | 385.605 | 447.866 | 371.905 | 322.736 |
| NM_002634 PHB      | 130.639 | 83.6403 | 73.1246 | 45.3634 |
| NM_030810 TXNDC5   | 181.386 | 104.845 | 75.6094 | 51.4821 |
| NM_001243 HLA-C    | 380.029 | 213.202 | 167.777 | 124.442 |
| NM_002265 KPNB1    | 209.485 | 131.929 | 125.921 | 92.1528 |
| NM_214710 PRSS57   | 230.942 | 42.791  | 8.48631 | 2.57787 |
| NM_006559 KHDRBS1  | 128.397 | 103.948 | 75.7137 | 50.5779 |
| NM_006925 SRSF5    | 160.886 | 160.649 | 125.465 | 106.055 |
| NM_006842 SF3B2    | 151.482 | 123.929 | 121.531 | 94.0051 |
| NM_002046 GAPDH    | 2945.13 | 4548.83 | 2112.71 | 1673.63 |
| NM_016145 C19orf56 | 134.583 | 131.13  | 111.514 | 103.014 |
| NM_001867 COX7C    | 338.396 | 363.755 | 296.799 | 192.593 |
| NM_001293 CLNS1A   | 146.585 | 101.281 | 80.0216 | 51.923  |
| NM_005918 MDH2     | 291.948 | 193.68  | 173.405 | 122.08  |
| NM_004450 ERH      | 205.471 | 123.332 | 123.877 | 90.9172 |
| NM_001360 DHCR7    | 114.776 | 130.039 | 61.4132 | 33.2633 |
| NM_004894 C14orf2  | 260.611 | 177.719 | 143.05  | 119.159 |
| NM_001909 CTSD     | 190.079 | 124.635 | 135.014 | 138.098 |
| NM_001037 EEF1B2   | 248.656 | 227.505 | 163.545 | 138.191 |
| NM_006808 SEC61B   | 154.846 | 113.035 | 121.043 | 91.6171 |
| NM_004599 SREBF2   | 118.326 | 149.985 | 116.896 | 106.476 |
| NR_003662 RPSAP58  | 1080.07 | 1355.49 | 982.349 | 744.114 |
| NM_000581 GPX1     | 396.057 | 227.247 | 146.045 | 119.835 |
| NM_013328 PYCR2    | 107.809 | 123.045 | 167.403 | 150.6   |
| NR_030299 MIR573   | 271.224 | 0       | 17.5061 | 0       |
| NM_004182 UXT      | 168.358 | 178.826 | 156.708 | 137.531 |
| NM_000660 TGFB1    | 162.08  | 149.929 | 77.2239 | 39.7269 |
| NM_004069 AP2S1    | 161.714 | 204.299 | 202.878 | 178.225 |
| NM_021109 TMSB4X   | 677.95  | 577.417 | 341.44  | 229.613 |
| NM_014624 S100A6   | 1150.58 | 2850.02 | 2341.9  | 1724.7  |
| NM_001641 APEX1    | 161.924 | 136.706 | 105.123 | 75.1857 |
| NM_001128 TFRC     | 695.679 | 1081.72 | 953.691 | 1221.77 |
| NM_000970 RPL6     | 521.653 | 527.171 | 401.772 | 307.225 |
| NM_003321 TUFM     | 238.283 | 171.378 | 151.389 | 99.6372 |
| NM_031287 SF3B5    | 319.908 | 246.339 | 239.794 | 191.275 |
| NM_003143 SSBP1    | 195.25  | 120.881 | 117.042 | 80.438  |
| NM_145899 HMGA1    | 405.805 | 425.772 | 360.261 | 245.199 |
| NM_006886 ATP5E    | 138.066 | 158.258 | 164.649 | 158.964 |
| NM_015523 REXO2    | 128.252 | 164.157 | 154.76  | 153.779 |
| NM_004551 NDUFS3   | 135.43  | 97.6464 | 96.6979 | 77.3993 |
| NM_017899 TESC     | 70.4537 | 99.6346 | 169.829 | 174.958 |



|                    |         |         |         |         |
|--------------------|---------|---------|---------|---------|
| NM_001128:CA1      | 213.701 | 556.82  | 251.044 | 109.665 |
| NM_002467 MYC      | 373.45  | 251.917 | 142.116 | 78.3987 |
| NM_002624 PFDN5    | 239.349 | 265.424 | 230.774 | 193.477 |
| NM_001008 RPS4Y1   | 351.86  | 420.897 | 306.96  | 220.612 |
| NM_002106 H2AFZ    | 422.611 | 289.609 | 274.645 | 217.748 |
| NM_032340 C6orf125 | 154.419 | 132.45  | 142.114 | 106.236 |
| NM_005617 RPS14    | 1136.86 | 1422.8  | 993.729 | 747.527 |
| NM_004044 ATIC     | 141.081 | 79.8432 | 75.271  | 48.2413 |
| NM_002105 H2AFX    | 235.329 | 191.634 | 224.995 | 176.976 |
| NM_005953 MT2A     | 48.8913 | 357.322 | 294.559 | 81.7205 |
| NM_001085:MZT2A    | 223.077 | 189.252 | 158.396 | 112.096 |
| NM_019059 TOMM7    | 111.29  | 140.621 | 101.804 | 88.7289 |
| NM_015476 C18orf10 | 125.296 | 152.278 | 131.38  | 112.249 |
| NM_005273 GNB2     | 225.588 | 250.467 | 269.463 | 264.462 |
| NM_138425 C12orf57 | 151.109 | 155.927 | 114.687 | 88.2415 |
| NM_000989 RPL30    | 1231.26 | 1361.23 | 994.309 | 846.457 |
| NM_003254 TIMP1    | 225.637 | 395.616 | 436.297 | 266.159 |
| NM_006666 RUVBL2   | 262.667 | 251.303 | 213.951 | 142.572 |
| NM_001614 ACTG1    | 913.024 | 386.516 | 136.118 | 77.0334 |
| NM_001004 RPLP2    | 2076.01 | 3058.4  | 2445.75 | 2270.59 |
| NM_006401 ANP32B   | 307.161 | 355.075 | 387.573 | 369.186 |
| NM_033022 RPS24    | 281.47  | 162.039 | 139.938 | 91.4612 |
| NM_005340 HINT1    | 341.711 | 305.691 | 237.393 | 204.235 |
| NM_000375 UROS     | 90.8576 | 193.222 | 164.508 | 163.327 |
| NM_003595 TPST2    | 133.277 | 279.067 | 77.2069 | 62.483  |
| NM_001533 HNRNPL   | 146.673 | 133.996 | 128.51  | 92.3368 |
| NM_007002 ADRM1    | 124.833 | 111.67  | 133.686 | 115.165 |
| NM_014045 LRP10    | 45.7746 | 94.0664 | 106.467 | 129.241 |
| NM_016139 CHCHD2   | 341.359 | 293.945 | 257.609 | 221.011 |
| NM_002631 PGD      | 327.886 | 325.855 | 177.025 | 120.624 |
| NM_145109 MAP2K3   | 43.5407 | 84.5915 | 139.902 | 156.104 |
| NM_000269 NME1     | 339.685 | 155.385 | 165.101 | 92.2299 |
| NM_000988 RPL27    | 1707.56 | 1852.39 | 1327.02 | 1080.64 |
| NM_001035:RPL38    | 354.14  | 271.391 | 231.533 | 163.135 |
| NM_007126 VCP      | 184.862 | 144.331 | 150.87  | 125.986 |
| NM_014183 DYNLRB1  | 146.084 | 158.24  | 122.808 | 99.2471 |
| NM_021102 SPINT2   | 101.27  | 161.731 | 111.71  | 79.6443 |
| NM_001020 RPS16    | 1548.93 | 2140.66 | 1541.11 | 1217.09 |
| NM_152326 ANKRD9   | 16.7028 | 62.083  | 86.5066 | 162.068 |
| NM_184041 ALDOA    | 844.146 | 2001.88 | 859.096 | 769.575 |
| NM_001142:FAM38A   | 130.778 | 111.904 | 87.7729 | 52.5845 |
| NR_030320 MIR550A2 | 0       | 384.23  | 0       | 0       |

|                    |         |         |         |         |
|--------------------|---------|---------|---------|---------|
| NM_001013 RPS9     | 1121.93 | 1380.9  | 1036.66 | 841.645 |
| NM_006427 SIVA1    | 181.137 | 152.677 | 163.401 | 130.676 |
| NM_001743 CALM2    | 193.772 | 155.049 | 135.529 | 101.18  |
| NM_001014 CUTA     | 152.944 | 122.482 | 87.6015 | 61.7786 |
| NM_001110 FLNA     | 235.092 | 156.77  | 101.335 | 52.6393 |
| NM_000485 APRT     | 189.081 | 169.031 | 151.39  | 95.5525 |
| NM_016333 SRRM2    | 215.478 | 211.813 | 195.203 | 166.299 |
| NM_003756 EIF3H    | 248.246 | 289.355 | 225.763 | 188.742 |
| NM_002567 PEBP1    | 240.483 | 124.101 | 97.3443 | 58.4807 |
| NM_016016 SLC25A39 | 114.632 | 313.877 | 571.305 | 777.364 |
| NM_003973 RPL14    | 392.744 | 459.3   | 342.557 | 226.294 |
| NM_001135 FDPS     | 96.1282 | 165.981 | 85.7189 | 62.6999 |
| NM_002136 HNRNPA1  | 190.469 | 158.192 | 106.929 | 77.5659 |
| NM_182810 ATF4     | 238.233 | 364.071 | 316.355 | 323.083 |
| NM_000997 RPL37    | 338.957 | 357.457 | 245.325 | 202.019 |
| NM_005437 NCOA4    | 14.5734 | 37.9138 | 80.7749 | 150.941 |
| NM_016491 MRPL37   | 182.054 | 190.665 | 171.844 | 148.944 |
| NM_005866 SIGMAR1  | 186.32  | 129.926 | 131.992 | 82.9284 |
| NM_001288 CLIC1    | 286.798 | 209.406 | 144.529 | 92.139  |
| NM_024407 NDUFS7   | 147.754 | 145.841 | 149.739 | 108.258 |
| NM_003755 EIF3G    | 260.361 | 202.324 | 195.579 | 149.09  |
| NM_003944 SELENBP1 | 18.6808 | 100.366 | 197.851 | 248.663 |
| NM_001762 CCT6A    | 149.572 | 114.461 | 108.097 | 75.6384 |
| NM_006472 TXNIP    | 31.8678 | 276.621 | 113.062 | 119.711 |
| NM_016633 AHSP     | 280.931 | 1651.37 | 2295.66 | 2584.67 |
| NM_001033 FBXO7    | 148.023 | 197.55  | 205.984 | 210.569 |
| NM_001760 CCND3    | 118.592 | 203.359 | 267.856 | 244.478 |
| NM_001042 MAZ      | 199.767 | 253.063 | 199.739 | 160.475 |
| NM_004859 CLTC     | 104.787 | 129.651 | 133.563 | 125.778 |
| NR_002162 ATP5EP2  | 289.962 | 208.664 | 284.429 | 286.267 |
| NM_005542 INSIG1   | 101.87  | 234.21  | 103.478 | 82.0791 |
| NM_001185 ADD2     | 59.678  | 167.563 | 168.484 | 152.263 |
| NM_005911 MAT2A    | 230.171 | 208.459 | 156.54  | 113.727 |
| NM_001001 RPL36AL  | 415.669 | 488.198 | 395.181 | 311.791 |
| NM_001605 AARS     | 93.3568 | 139.953 | 172.245 | 197.907 |
| NM_015024 XPO7     | 40.8375 | 46.0566 | 96.7901 | 180.979 |
| NM_014338 PISD     | 80.6947 | 132.794 | 118.493 | 94.8659 |
| NM_013336 SEC61A1  | 161.677 | 89.2257 | 90.5727 | 78.9243 |
| NM_016292 TRAP1    | 193.417 | 160.564 | 141.581 | 83.5196 |
| NM_004930 CAPZB    | 128.514 | 102.601 | 86.9365 | 63.5825 |
| NM_002129 HMGB2    | 293.492 | 537.157 | 566.179 | 532.221 |
| NM_015966 ERGIC3   | 227.905 | 257.138 | 187.815 | 155.392 |

|           |          |         |         |         |         |
|-----------|----------|---------|---------|---------|---------|
| NM_002819 | PTBP1    | 211.703 | 141.264 | 129.65  | 90.4446 |
| NM_033296 | MRFAP1   | 137.477 | 112.249 | 100.592 | 80.4654 |
| NM_001145 | YPEL3    | 14.6102 | 64.81   | 65.323  | 151.234 |
| NM_005009 | NME4     | 452.066 | 520.83  | 446.445 | 317.329 |
| NM_006004 | UQCRH    | 343.39  | 321.966 | 248.347 | 168.874 |
| NM_005563 | STMN1    | 312.112 | 242.433 | 183.044 | 133.892 |
| NM_000713 | BLVRB    | 669.981 | 1954.66 | 2552.39 | 2815.6  |
| NM_004168 | SDHA     | 156.497 | 145.763 | 119.792 | 90.4943 |
| NM_006325 | RAN      | 564.576 | 438.592 | 457.393 | 343.549 |
| NM_000395 | CSF2RB   | 145.624 | 45.6932 | 24.3943 | 8.27272 |
| NR_031619 | MIR1287  | 0       | 371.761 | 0       | 146.668 |
| NM_019096 | GTPBP2   | 31.4558 | 70.067  | 101.9   | 172.592 |
| NR_037434 | MIR3661  | 37.6898 | 0       | 89.5038 | 171.896 |
| NM_006516 | SLC2A1   | 40.7699 | 217.874 | 355.397 | 701.06  |
| NM_001404 | EEF1G    | 478.125 | 480.721 | 353.433 | 288.244 |
| NM_006263 | PSME1    | 133.026 | 122.141 | 126.109 | 108.223 |
| NM_014206 | C11orf10 | 249.46  | 200.247 | 157.968 | 126.783 |
| NM_001402 | EEF1A1   | 2261.35 | 2514.92 | 1835.07 | 1486.67 |
| NM_005318 | H1FO     | 25.0715 | 241.771 | 383.644 | 648.433 |
| NR_000020 | SNORD33  | 0       | 0       | 2767.6  | 0       |
| NM_002047 | GARS     | 102.388 | 130.008 | 150.413 | 166.846 |
| NM_001002 | (ATP5G1  | 160.771 | 115.291 | 102.092 | 67.7581 |
| NM_000121 | EPOR     | 43.458  | 89.8343 | 105.224 | 132.051 |
| NM_006280 | SSR4     | 214.28  | 173.399 | 157.9   | 103.727 |
| NM_001827 | CKS2     | 205.822 | 246.062 | 180.808 | 145.446 |
| NM_003366 | UQCRC2   | 185.646 | 142.297 | 124.324 | 96.0312 |
| NM_031314 | HNRNPC   | 194.785 | 125.889 | 125.973 | 85.3945 |
| NM_006579 | EBP      | 157.593 | 150.855 | 94.3585 | 61.7355 |
| NM_001024 | HMBS     | 67.5125 | 483.007 | 755.622 | 922.034 |
| NM_198589 | BSG      | 367.854 | 639.12  | 818.62  | 978.114 |
| NM_021009 | UBC      | 389.158 | 665.577 | 516.388 | 639.521 |
| NM_000559 | HBG1     | 196.495 | 2112.81 | 5086.33 | 9069.02 |
| NM_003355 | UCP2     | 188.149 | 494.758 | 680.881 | 772     |
| NR_030361 | MIR33B   | 88.6171 | 0       | 370.903 | 0       |
| NM_000270 | PNP      | 83.1245 | 105.423 | 124.324 | 174.942 |
| NM_024923 | NUP210   | 131.963 | 108.675 | 101.024 | 74.0498 |
| NM_016199 | LSM7     | 295.643 | 195.268 | 174.2   | 111.582 |
| NM_005348 | HSP90AA1 | 452.621 | 331.402 | 353.687 | 289.034 |
| NM_000517 | HBA2     | 1159.1  | 21176.4 | 61215.1 | 101559  |
| NM_002883 | RANGAP1  | 156.222 | 122.695 | 154.893 | 122.86  |
| NR_031639 | MIR1304  | 1215.67 | 0       | 297.386 | 333.11  |
| NM_005005 | NDUFB9   | 299.788 | 227.2   | 222.605 | 174.838 |

|           |           |         |         |         |         |
|-----------|-----------|---------|---------|---------|---------|
| NR_024031 | KIAA0114  | 269.452 | 155.29  | 154.207 | 96.4003 |
| NM_004637 | RAB7A     | 152.271 | 139.976 | 120.595 | 99.6369 |
| NM_002708 | PPP1CA    | 181.592 | 176.479 | 171.322 | 153.494 |
| NM_002128 | HMGB1     | 154.096 | 111.56  | 108.071 | 78.3233 |
| NR_002315 | LOC440926 | 196.994 | 212.544 | 218.834 | 197.23  |
| NM_012181 | FKBP8     | 223.007 | 388.78  | 435.824 | 580.548 |
| NM_001618 | PARP1     | 131.577 | 74.1201 | 71.6704 | 48.4041 |
| NM_000291 | PGK1      | 206.402 | 617.653 | 192.224 | 151.689 |
| NM_004373 | COX6A1    | 190.61  | 175.08  | 160.954 | 145.927 |
| NM_000274 | OAT       | 91.7192 | 154.906 | 153.833 | 156.159 |
| NM_006429 | CCT7      | 323.521 | 225.493 | 213.501 | 151.727 |
| NM_000558 | HBA1      | 3139.33 | 56839.7 | 140546  | 214560  |
| NM_001417 | EIF4B     | 149.2   | 142.592 | 84.5108 | 59.0393 |
| NM_004597 | SNRPD2    | 401.697 | 364.523 | 273.751 | 188.689 |
| NM_001018 | RPS15     | 1072.09 | 1110.78 | 911.572 | 685.067 |
| NM_001040 | H2AFY     | 145.971 | 93.3681 | 92.7611 | 70.214  |
| NM_001175 | ARHGDIB   | 399.823 | 126.106 | 73.2277 | 40.1126 |
| NM_001013 | MPST      | 113.508 | 139.33  | 113.783 | 90.1487 |
