# Supplementary material
Source: PubMed Central journal article supplement (PMC4119405)
Supplement: supp_ddu167_ddu167supp_table5.pdf [file supp_ddu167_ddu167supp_table5.pdf]

| Name      | Day 4 | Day 8 | Day 11 | Day 14 |
|-----------|-------|-------|--------|--------|
| MIR663    | 2363  | 7885  | 4226   | 3845   |
| FTH1      | 1352  | 2525  | 2714   | 4108   |
| MIR1304   | 1216  | 0     | 297    | 333    |
| NCL       | 818   | 487   | 432    | 240    |
| HSP90AB3P | 307   | 206   | 174    | 121    |
| RPS29     | 269   | 642   | 324    | 170    |
| SLIRP     | 261   | 166   | 164    | 103    |
| FKBP5     | 259   | 181   | 61     | 37     |
| PRSS57    | 231   | 43    | 8      | 3      |
| HSPD1     | 215   | 126   | 115    | 84     |
| SSR2      | 213   | 138   | 97     | 72     |
| RPN1      | 202   | 121   | 109    | 80     |
| ECH1      | 195   | 268   | 161    | 104    |
| MIR570    | 180   | 384   | 26     | 0      |
| PDIA3P    | 178   | 83    | 72     | 49     |
| MIR5047   | 175   | 546   | 83     | 148    |
| ACAT2     | 167   | 164   | 104    | 66     |
| MIR636    | 156   | 340   | 11     | 288    |
| TPST2     | 134   | 280   | 78     | 63     |
| DPP7      | 131   | 106   | 83     | 51     |
| BCAP31    | 122   | 76    | 60     | 43     |
| RPS18     | 114   | 183   | 99     | 64     |
| ZNFX1-AS1 | 103   | 96    | 57     | 38     |
| DDX21     | 102   | 62    | 59     | 40     |
| ERGIC1    | 101   | 52    | 38     | 23     |
| GLT25D1   | 99    | 58    | 54     | 36     |
| LAMTOR2   | 96    | 62    | 54     | 38     |
| PKN1      | 89    | 68    | 48     | 30     |
| SNORD22   | 83    | 31    | 26     | 56     |
| NANS      | 76    | 46    | 40     | 28     |
| ELOVL6    | 75    | 94    | 55     | 35     |
| PTGES2    | 71    | 37    | 41     | 26     |
| BCL7C     | 71    | 55    | 41     | 25     |
| ADI1      | 69    | 31    | 36     | 25     |
| CTNNB1    | 68    | 44    | 32     | 25     |
| PCYT2     | 66    | 78    | 46     | 30     |
| C2Oorf3   | 66    | 39    | 35     | 25     |
| RRP1      | 62    | 36    | 36     | 20     |
| BCKDHA    | 59    | 91    | 45     | 35     |
| LRFN4     | 57    | 35    | 32     | 18     |
| NACC1     | 53    | 36    | 35     | 21     |

|           |    |     |     |     |
|-----------|----|-----|-----|-----|
| MIR3652   | 53 | 141 | 63  | 47  |
| ADCK3     | 52 | 38  | 21  | 14  |
| IDH1      | 51 | 42  | 18  | 16  |
| RANGRF    | 50 | 33  | 29  | 19  |
| RAP1B     | 50 | 38  | 26  | 20  |
| MOGS      | 48 | 32  | 25  | 17  |
| EHBP1L1   | 48 | 116 | 142 | 134 |
| RPUSD1    | 46 | 21  | 21  | 13  |
| LTA4H     | 45 | 38  | 23  | 16  |
| SPAG7     | 45 | 36  | 26  | 17  |
| CYP51A1   | 44 | 52  | 28  | 19  |
| SIL1      | 43 | 37  | 23  | 16  |
| FAM203A   | 42 | 18  | 23  | 14  |
| ERF       | 41 | 29  | 22  | 14  |
| MCMBP     | 40 | 23  | 21  | 14  |
| PRRC2B    | 39 | 26  | 21  | 14  |
| MIR3661   | 38 | 0   | 90  | 172 |
| UBQLN4    | 38 | 23  | 20  | 12  |
| STAG3L2   | 38 | 18  | 16  | 10  |
| C14orf159 | 37 | 21  | 15  | 9   |
| TNRC18    | 37 | 26  | 18  | 14  |
| C11orf21  | 37 | 20  | 26  | 14  |
| NUDT3     | 36 | 25  | 20  | 12  |
| ACSS2     | 35 | 85  | 28  | 18  |
| PNPO      | 33 | 16  | 19  | 13  |
| IER2      | 33 | 95  | 45  | 45  |
| TMEM43    | 32 | 29  | 18  | 12  |
| SCARNA22  | 32 | 86  | 71  | 256 |
| ARRDC1    | 31 | 18  | 12  | 8   |
| C3orf78   | 31 | 19  | 17  | 10  |
| CEBPZ     | 30 | 21  | 17  | 12  |
| SLC17A9   | 30 | 19  | 12  | 6   |
| MGMT      | 30 | 20  | 15  | 10  |
| SDCCAG3   | 30 | 18  | 17  | 9   |
| TRIM65    | 29 | 16  | 14  | 8   |
| USP36     | 29 | 18  | 15  | 10  |
| SELRC1    | 28 | 18  | 16  | 9   |
| SNORA84   | 28 | 5   | 6   | 16  |
| SLC30A5   | 28 | 24  | 17  | 11  |
| HSP90B3P  | 28 | 14  | 11  | 8   |
| ORAI3     | 27 | 42  | 18  | 14  |
| TPCN1     | 27 | 22  | 13  | 9   |

|             |    |    |     |    |
|-------------|----|----|-----|----|
| MACROD1     | 26 | 20 | 15  | 8  |
| SNORA40     | 26 | 0  | 9   | 7  |
| ECE2        | 25 | 17 | 11  | 7  |
| GIPC1       | 25 | 15 | 13  | 8  |
| TRMT61A     | 25 | 13 | 16  | 10 |
| C3orf21     | 25 | 12 | 11  | 8  |
| SNORA3      | 24 | 11 | 22  | 7  |
| APOBR       | 24 | 11 | 6   | 3  |
| FLYWCH2     | 23 | 14 | 12  | 9  |
| QPRT        | 23 | 47 | 18  | 10 |
| JMJD4       | 23 | 15 | 13  | 9  |
| MRM1        | 23 | 15 | 14  | 8  |
| PGAM4       | 23 | 23 | 12  | 9  |
| STAG3L3     | 22 | 12 | 11  | 7  |
| DOCK8       | 22 | 11 | 7   | 4  |
| C6orf25     | 22 | 14 | 2   | 1  |
| PRKRA       | 22 | 16 | 10  | 7  |
| SCRN2       | 22 | 14 | 10  | 6  |
| GTF3C4      | 21 | 16 | 12  | 8  |
| MSTO2P      | 21 | 11 | 11  | 7  |
| INTS9       | 21 | 13 | 10  | 7  |
| GBE1        | 20 | 55 | 15  | 9  |
| LIG3        | 20 | 13 | 11  | 8  |
| ZNF121      | 20 | 19 | 12  | 8  |
| C1orf15-NBL | 19 | 10 | 8   | 3  |
| KIAA0141    | 19 | 16 | 12  | 7  |
| PNO1        | 19 | 11 | 11  | 6  |
| LOC606724   | 18 | 6  | 3   | 2  |
| HYAL2       | 18 | 12 | 10  | 7  |
| SPTSSA      | 18 | 14 | 10  | 6  |
| ANKRD28     | 18 | 15 | 8   | 5  |
| TP53I13     | 18 | 15 | 6   | 3  |
| METRNL      | 18 | 11 | 5   | 2  |
| FAM125A     | 17 | 14 | 9   | 6  |
| GTPBP3      | 17 | 11 | 9   | 6  |
| AMT         | 17 | 14 | 8   | 4  |
| RNF216L     | 17 | 10 | 9   | 6  |
| PINX1       | 17 | 10 | 10  | 7  |
| B7H6        | 16 | 15 | 9   | 5  |
| MIR223      | 16 | 86 | 102 | 0  |
| ZZZ3        | 16 | 10 | 8   | 5  |
| LRRC8D      | 16 | 25 | 13  | 9  |

|           |    |    |    |    |
|-----------|----|----|----|----|
| IRF2BPL   | 16 | 14 | 9  | 6  |
| SATB1     | 16 | 10 | 6  | 6  |
| ST8SIA6   | 15 | 11 | 8  | 5  |
| IMPAD1    | 15 | 10 | 7  | 5  |
| PP7080    | 15 | 10 | 9  | 6  |
| FAM60A    | 15 | 13 | 7  | 5  |
| ZDHHC18   | 15 | 13 | 8  | 5  |
| CNTRL     | 14 | 9  | 7  | 6  |
| HGSNAT    | 14 | 8  | 6  | 5  |
| RDH13     | 14 | 10 | 9  | 6  |
| SLC41A1   | 14 | 28 | 15 | 11 |
| SNORA24   | 14 | 10 | 5  | 4  |
| POLG2     | 14 | 11 | 8  | 5  |
| ZMYM6NB   | 14 | 8  | 8  | 5  |
| ANGEL1    | 13 | 11 | 9  | 5  |
| VPS4B     | 13 | 7  | 5  | 5  |
| ACTR8     | 13 | 8  | 7  | 5  |
| SNORA22   | 13 | 3  | 5  | 0  |
| ZNF710    | 13 | 8  | 8  | 5  |
| TAMM41    | 13 | 9  | 9  | 5  |
| ARMC7     | 13 | 7  | 6  | 5  |
| CMTM5     | 13 | 12 | 1  | 1  |
| MRI1      | 12 | 7  | 6  | 4  |
| CCDC92    | 12 | 7  | 4  | 2  |
| HSP90AB2P | 12 | 7  | 6  | 5  |
| ZNF398    | 12 | 8  | 7  | 5  |
| ALG1      | 12 | 8  | 7  | 5  |
| HLA-H     | 12 | 6  | 4  | 5  |
| LOC643988 | 12 | 6  | 3  | 1  |
| CERS6     | 12 | 7  | 4  | 3  |
| TTC3P1    | 12 | 8  | 5  | 3  |
| FAM165B   | 12 | 7  | 6  | 4  |
| C22orf29  | 12 | 7  | 6  | 4  |
| CABLES1   | 12 | 5  | 4  | 3  |
| SNORA77   | 11 | 7  | 19 | 12 |
| MTL5      | 11 | 12 | 6  | 3  |
| PPTC7     | 11 | 8  | 6  | 4  |
| SRGAP2P2  | 11 | 22 | 27 | 35 |
| RNF149    | 11 | 8  | 5  | 3  |
| HENMT1    | 10 | 4  | 3  | 2  |
| DNAAF2    | 10 | 6  | 5  | 3  |
| ZNF445    | 10 | 5  | 5  | 3  |

|            |    |    |    |    |
|------------|----|----|----|----|
| LOC1002707 | 10 | 4  | 2  | 0  |
| HIST2H2AC  | 10 | 11 | 18 | 25 |
| CTNNBIP1   | 10 | 6  | 4  | 3  |
| CNST       | 9  | 10 | 5  | 3  |
| MIR671     | 9  | 20 | 8  | 26 |
| LOC1005060 | 9  | 2  | 3  | 2  |
| SNORA6     | 9  | 17 | 6  | 8  |
| LOC1002935 | 9  | 7  | 5  | 3  |
| RASSF3     | 9  | 3  | 2  | 1  |
| SAMD10     | 9  | 7  | 5  | 3  |
| TRIP10     | 9  | 13 | 9  | 5  |
| ZNF358     | 9  | 5  | 1  | 1  |
| BCORL1     | 9  | 5  | 3  | 2  |
| XKR8       | 9  | 6  | 5  | 3  |
| LOC644961  | 9  | 4  | 2  | 2  |
| LOC729020  | 8  | 5  | 5  | 3  |
| MBTD1      | 8  | 6  | 3  | 3  |
| ZNF761     | 8  | 5  | 4  | 3  |
| WDFY2      | 8  | 5  | 3  | 2  |
| SNORA33    | 8  | 5  | 3  | 3  |
| TARSL2     | 8  | 6  | 5  | 3  |
| ZNF33B     | 8  | 4  | 3  | 2  |
| WDR60      | 8  | 13 | 6  | 4  |
| B3GNT1     | 8  | 6  | 4  | 3  |
| NLN        | 8  | 3  | 2  | 1  |
| CHPF       | 8  | 4  | 1  | 1  |
| METAP1D    | 8  | 5  | 4  | 3  |
| ZNF69      | 8  | 4  | 2  | 1  |
| SUZ12P     | 8  | 6  | 5  | 3  |
| PLA2G15    | 8  | 7  | 5  | 3  |
| SNORA56    | 8  | 13 | 1  | 6  |
| FAM120C    | 8  | 6  | 3  | 2  |
| SNORA8     | 8  | 8  | 3  | 9  |
| C17orf109  | 8  | 36 | 67 | 89 |
| SLC7A5P2   | 8  | 12 | 19 | 23 |
| C22orf34   | 8  | 5  | 5  | 3  |
| KIAA0889   | 8  | 4  | 2  | 1  |
| ACCS       | 8  | 9  | 5  | 2  |
| SNORA9     | 7  | 13 | 4  | 1  |
| LOC1005067 | 7  | 6  | 3  | 2  |
| UBE2NL     | 7  | 5  | 4  | 3  |
| ARHGAP33   | 7  | 19 | 16 | 15 |

|             |   |    |    |    |
|-------------|---|----|----|----|
| RINL        | 7 | 8  | 5  | 2  |
| KLHL8       | 7 | 5  | 4  | 3  |
| SEPT5-GP1BE | 7 | 10 | 2  | 1  |
| DEGS2       | 7 | 9  | 4  | 1  |
| LOC1001308  | 7 | 20 | 18 | 18 |
| LOC1005066  | 7 | 2  | 3  | 1  |
| DSTNP2      | 7 | 4  | 3  | 3  |
| CNOT6L      | 7 | 5  | 3  | 2  |
| HSP90AA6P   | 7 | 3  | 3  | 2  |
| SLC19A2     | 7 | 5  | 3  | 2  |
| FBXW8       | 7 | 3  | 3  | 2  |
| CIDECP      | 7 | 11 | 15 | 21 |
| FAM123B     | 7 | 3  | 3  | 1  |
| LOC1001293  | 6 | 4  | 3  | 2  |
| L2HGDH      | 6 | 4  | 3  | 2  |
| SIAE        | 6 | 5  | 3  | 2  |
| LOC728739   | 6 | 3  | 3  | 2  |
| SSH2        | 6 | 4  | 3  | 2  |
| ZNF714      | 6 | 3  | 3  | 2  |
| CCDC169     | 6 | 6  | 4  | 2  |
| ZNF440      | 6 | 4  | 3  | 2  |
| USP40       | 6 | 4  | 2  | 1  |
| DYRK1B      | 6 | 13 | 12 | 16 |
| FTH1P3      | 6 | 8  | 13 | 15 |
| ABHD15      | 6 | 3  | 1  | 1  |
| PMF1-BGLAP  | 6 | 3  | 2  | 2  |
| NCRNA00341  | 6 | 13 | 15 | 20 |
| SLC35E3     | 6 | 4  | 2  | 1  |
| ZC4H2       | 6 | 4  | 2  | 2  |
| SOCS7       | 6 | 4  | 3  | 2  |
| GOLGA2B     | 6 | 5  | 3  | 2  |
| PLEKHA8P1   | 6 | 3  | 2  | 1  |
| SNORA20     | 6 | 6  | 2  | 0  |
| SNORA34     | 5 | 2  | 1  | 2  |
| ZNF71       | 5 | 4  | 2  | 1  |
| NCKAP5L     | 5 | 2  | 1  | 0  |
| CD276       | 5 | 3  | 3  | 1  |
| MED12L      | 5 | 3  | 1  | 1  |
| C4orf32     | 5 | 6  | 4  | 2  |
| FAM86DP     | 5 | 3  | 3  | 2  |
| SNORA55     | 5 | 6  | 2  | 0  |
| SCARNA9L    | 5 | 6  | 4  | 1  |

|            |   |    |    |    |
|------------|---|----|----|----|
| MIR3665    | 5 | 0  | 9  | 29 |
| TMEM107    | 5 | 6  | 3  | 2  |
| C7orf74    | 5 | 15 | 24 | 35 |
| PITPNC1    | 5 | 4  | 1  | 1  |
| C21orf91   | 5 | 2  | 1  | 1  |
| IL18BP     | 5 | 12 | 12 | 11 |
| KIAA1958   | 5 | 3  | 2  | 1  |
| SLC36A4    | 5 | 3  | 2  | 2  |
| LOC1004994 | 5 | 4  | 3  | 2  |
| FHIT       | 5 | 5  | 3  | 2  |
| ZNF322     | 5 | 3  | 3  | 2  |
| TRIM16L    | 5 | 4  | 2  | 1  |
| DPEP2      | 5 | 9  | 2  | 2  |
| BCRP3      | 4 | 3  | 2  | 1  |
| FAM109A    | 4 | 3  | 3  | 2  |
| VAV2       | 4 | 3  | 2  | 1  |
| GATSL3     | 4 | 8  | 3  | 2  |
| ARHGAP10   | 4 | 3  | 2  | 1  |
| ZNF354B    | 4 | 2  | 1  | 1  |
| ZKSCAN3    | 4 | 2  | 2  | 1  |
| LOC1005056 | 4 | 2  | 1  | 1  |
| SNORA47    | 4 | 0  | 1  | 2  |
| LOC653653  | 4 | 2  | 1  | 1  |
| ZBTB49     | 4 | 2  | 2  | 2  |
| C11orf95   | 4 | 2  | 1  | 1  |
| KIF1B      | 4 | 2  | 1  | 1  |
| SNORA62    | 4 | 7  | 1  | 4  |
| PDE6G      | 4 | 3  | 2  | 2  |
| RPS6KA5    | 4 | 2  | 2  | 2  |
| RELL2      | 4 | 2  | 2  | 1  |
| LOC1006309 | 4 | 4  | 2  | 1  |
| MUTED-TXNI | 4 | 0  | 2  | 2  |
| SNORD97    | 4 | 2  | 6  | 5  |
| GALM       | 4 | 6  | 2  | 1  |
| APOC1P1    | 4 | 4  | 1  | 1  |
| SNAPC1     | 4 | 4  | 2  | 1  |
| SH3YL1     | 4 | 3  | 2  | 1  |
| PHLDB3     | 4 | 8  | 4  | 3  |
| SNORA45    | 4 | 10 | 4  | 2  |
| C8orf58    | 4 | 4  | 2  | 2  |
| LOC282997  | 3 | 2  | 1  | 1  |
| ZHX2       | 3 | 2  | 1  | 1  |

|            |   |    |    |    |
|------------|---|----|----|----|
| ACSF2      | 3 | 3  | 1  | 1  |
| ERV3-1     | 3 | 2  | 2  | 1  |
| CCDC165    | 3 | 3  | 2  | 1  |
| MFSD2A     | 3 | 2  | 2  | 1  |
| LOC1005058 | 3 | 2  | 2  | 1  |
| PRICKLE4   | 3 | 4  | 2  | 1  |
| FKTN       | 3 | 2  | 2  | 1  |
| LOC729737  | 3 | 9  | 7  | 6  |
| RCN3       | 3 | 4  | 2  | 1  |
| ZNF383     | 3 | 3  | 2  | 1  |
| LOC286467  | 3 | 2  | 1  | 1  |
| LOC389641  | 3 | 2  | 2  | 1  |
| FER        | 3 | 2  | 1  | 1  |
| CFL2       | 3 | 2  | 2  | 1  |
| SNORA29    | 3 | 1  | 4  | 1  |
| SNORA51    | 3 | 13 | 4  | 5  |
| C12orf76   | 3 | 3  | 1  | 1  |
| RNU11      | 3 | 5  | 10 | 18 |
| METTL21B   | 3 | 3  | 2  | 1  |
| LOC1004994 | 3 | 3  | 2  | 1  |
| PPM1L      | 3 | 1  | 1  | 1  |
| ZNF229     | 3 | 3  | 2  | 1  |
| PROCA1     | 3 | 2  | 2  | 1  |
| LOC550112  | 3 | 4  | 2  | 1  |
| RAB40B     | 3 | 3  | 2  | 1  |
| C17orf72   | 3 | 3  | 1  | 1  |
| ZNF595     | 3 | 2  | 1  | 1  |
| NMNAT1     | 3 | 2  | 1  | 1  |
| SPATA24    | 3 | 2  | 2  | 1  |
| MACC1      | 3 | 1  | 1  | 0  |
| AXL        | 3 | 8  | 7  | 2  |
| HLA-F-AS1  | 3 | 8  | 6  | 6  |
| LOC642852  | 3 | 2  | 1  | 1  |
| HIST1H4I   | 3 | 4  | 6  | 6  |
| ZNF10      | 3 | 2  | 1  | 1  |
| PAN3-AS1   | 2 | 2  | 1  | 1  |
| LOC678655  | 2 | 5  | 3  | 2  |
| SCARNA8    | 2 | 4  | 1  | 1  |
| LRRC56     | 2 | 2  | 1  | 1  |
| ABCD1      | 2 | 2  | 1  | 1  |
| FAM127C    | 2 | 6  | 2  | 2  |
| CCL28      | 2 | 4  | 2  | 2  |



|              |   |    |   |    |
|--------------|---|----|---|----|
| MATL2963     | 2 | 1  | 1 | 1  |
| ZNF575       | 2 | 1  | 1 | 1  |
| SNORA59A     | 2 | 6  | 3 | 1  |
| SNORA59B     | 2 | 6  | 4 | 4  |
| FAM55C       | 2 | 2  | 1 | 1  |
| C19orf71     | 2 | 2  | 4 | 7  |
| C20orf194    | 2 | 3  | 2 | 1  |
| ZDHHC21      | 2 | 1  | 1 | 1  |
| ZFYVE16      | 2 | 1  | 1 | 1  |
| ZNF880       | 2 | 3  | 2 | 1  |
| LOC1005067   | 2 | 2  | 1 | 1  |
| ZNF525       | 2 | 2  | 1 | 1  |
| LOC1005075   | 2 | 3  | 2 | 1  |
| LOC644936    | 2 | 1  | 1 | 2  |
| B3GNT9       | 2 | 3  | 2 | 1  |
| LOC1005268   | 2 | 1  | 1 | 0  |
| ZNF235       | 2 | 1  | 1 | 1  |
| SNORA12      | 2 | 5  | 0 | 8  |
| LOC644246    | 2 | 5  | 5 | 5  |
| PCSK4        | 2 | 5  | 2 | 1  |
| LOC1001310   | 2 | 2  | 1 | 1  |
| STX16-NPEPL  | 2 | 1  | 1 | 0  |
| HIST1H2AH    | 2 | 4  | 7 | 11 |
| DDX11L2      | 1 | 4  | 5 | 5  |
| LOC645781    | 1 | 11 | 8 | 6  |
| C17orf61-PL5 | 1 | 2  | 1 | 1  |
| HIST3H2BB    | 1 | 3  | 7 | 18 |
| TMEM45A      | 1 | 6  | 2 | 1  |
| TERC         | 1 | 4  | 2 | 4  |
| OPLAH        | 1 | 4  | 3 | 4  |
| SCARNA20     | 1 | 12 | 7 | 18 |
| ITLN2        | 1 | 3  | 2 | 1  |
| C7orf58      | 1 | 3  | 2 | 2  |
| SNORA41      | 1 | 4  | 2 | 5  |
| MIRLET7BHG   | 1 | 1  | 2 | 1  |
| LOC1001290   | 1 | 3  | 4 | 6  |
| SNORA16B     | 1 | 4  | 0 | 1  |
| SCARNA13     | 1 | 3  | 5 | 7  |
| SPTBN4       | 1 | 4  | 4 | 3  |
| SNORA80B     | 1 | 2  | 4 | 15 |
| HIST2H3A     | 1 | 2  | 5 | 12 |
| HIST2H3C     | 1 | 2  | 5 | 12 |

|            |   |    |    |    |
|------------|---|----|----|----|
| LOC1005057 | 1 | 2  | 2  | 5  |
| C11orf35   | 1 | 2  | 1  | 2  |
| HIST2H3D   | 1 | 1  | 4  | 9  |
| SCARNA10   | 1 | 2  | 2  | 2  |
| HSPA7      | 1 | 5  | 2  | 2  |
| VASN       | 1 | 2  | 2  | 5  |
| LOC1001317 | 1 | 2  | 3  | 5  |
| TMEM56-RW  | 1 | 5  | 5  | 7  |
| MRGPRE     | 1 | 4  | 4  | 2  |
| SLFN14     | 1 | 7  | 9  | 14 |
| C9orf172   | 1 | 2  | 2  | 2  |
| LOC399815  | 1 | 1  | 2  | 1  |
| PODNL1     | 1 | 2  | 2  | 2  |
| LOC162632  | 1 | 6  | 6  | 8  |
| TSPAN18    | 0 | 1  | 1  | 1  |
| IFITM4P    | 0 | 3  | 3  | 1  |
| SEC14L6    | 0 | 2  | 3  | 3  |
| MIR210HG   | 0 | 21 | 6  | 10 |
| CBLN3      | 0 | 1  | 1  | 2  |
| PAGE2      | 0 | 1  | 2  | 2  |
| LOC643339  | 0 | 1  | 3  | 7  |
| PKD1L3     | 0 | 1  | 3  | 3  |
| LOC1001322 | 0 | 5  | 4  | 3  |
| INO80B-WBF | 0 | 6  | 2  | 8  |
| MIR210     | 0 | 22 | 20 | 74 |
| SNORA42    | 0 | 2  | 2  | 11 |
| RNU12      | 0 | 1  | 2  | 5  |
