# Supplementary material
Source: PubMed Central journal article supplement (PMC4119405)
Supplement: supp_ddu167_ddu167supp_table6.pdf [file supp_ddu167_ddu167supp_table6.pdf]

|           | Category  | Term        | Count | %          | PValue   | Genes        | List Total | Pop Hits | Pop Total | Fold Enrichm | Bonferroni | Benjamini | FDR        |
|-----------|-----------|-------------|-------|------------|----------|--------------|------------|----------|-----------|--------------|------------|-----------|------------|
| cluster 1 | UCSC_TFBS | AHR         | 544   | 3.80339789 | 5.06E-07 | HIST2H2AA3,  | 1649       | 5409     | 19536     | 1.19150785   | 9.01E-05   | 4.74E-06  | 6.23E-04   |
|           | UCSC_TFBS | AHRARNT     | 811   | 5.67013913 | 1.70E-05 | MEF2C, LDH/  | 1649       | 8647     | 19536     | 1.1111441    | 0.00302347 | 8.65E-05  | 0.02091262 |
|           | UCSC_TFBS | AP1         | 980   | 6.85170943 | 3.65E-13 | MEF2C, PPP2  | 1649       | 9952     | 19536     | 1.16662344   | 6.49E-11   | 6.49E-11  | 4.48E-10   |
|           | UCSC_TFBS | AP4         | 1021  | 7.13836258 | 1.48E-09 | MEF2C, ALDI  | 1649       | 10734    | 19536     | 1.12688382   | 2.64E-07   | 3.77E-08  | 1.82E-06   |
|           | UCSC_TFBS | ARP1        | 736   | 5.14577361 | 1.83E-05 | MEF2C, ALDI  | 1649       | 7772     | 19536     | 1.12191515   | 0.00325154 | 8.57E-05  | 0.0224925  |
|           | UCSC_TFBS | ATF         | 520   | 3.63560092 | 2.23E-07 | ALDH8A1, HI  | 1649       | 5106     | 19536     | 1.20652833   | 3.97E-05   | 2.48E-06  | 2.74E-04   |
|           | UCSC_TFBS | BACH1       | 782   | 5.46738446 | 4.27E-06 | MEF2C, ALDI  | 1649       | 8236     | 19536     | 1.12487796   | 7.60E-04   | 2.53E-05  | 0.00524988 |
|           | UCSC_TFBS | BACH2       | 692   | 4.83814584 | 1.39E-07 | HCCS, MEF2C  | 1649       | 7041     | 19536     | 1.16435856   | 2.48E-05   | 1.65E-06  | 1.71E-04   |
|           | UCSC_TFBS | COUP        | 658   | 4.60043348 | 2.70E-06 | MEF2C, PPP2  | 1649       | 6778     | 19536     | 1.15010984   | 4.80E-04   | 1.78E-05  | 0.00331643 |
|           | UCSC_TFBS | CP2         | 642   | 4.48856883 | 1.62E-08 | MEF2C, PEA   | 1649       | 6383     | 19536     | 1.1915854    | 2.88E-06   | 3.20E-07  | 1.99E-05   |
|           | UCSC_TFBS | CREB        | 670   | 4.68433196 | 6.68E-06 | MEF2C, ALDI  | 1649       | 6956     | 19536     | 1.14111712   | 0.00118757 | 3.83E-05  | 0.00820709 |
|           | UCSC_TFBS | E2F         | 878   | 6.13857233 | 1.06E-05 | MEF2C, PPP2  | 1649       | 9411     | 19536     | 1.10528362   | 0.00187915 | 5.88E-05  | 0.01299068 |
|           | UCSC_TFBS | E47         | 936   | 6.54408166 | 1.74E-05 | MEF2C, ALDI  | 1649       | 10129    | 19536     | 1.09477348   | 0.00309569 | 8.38E-05  | 0.02141284 |
|           | UCSC_TFBS | ER          | 787   | 5.50234217 | 1.70E-05 | MEF2C, PPP2  | 1649       | 8363     | 19536     | 1.11487872   | 0.00302989 | 8.43E-05  | 0.0209571  |
|           | UCSC_TFBS | HEN1        | 936   | 6.54408166 | 1.02E-09 | MEF2C, PPP2  | 1649       | 9699     | 19536     | 1.14330968   | 1.82E-07   | 3.04E-08  | 1.26E-06   |
|           | UCSC_TFBS | HMX1        | 733   | 5.12479899 | 4.59E-08 | HCCS, PEAR1  | 1649       | 7467     | 19536     | 1.16298152   | 8.16E-06   | 7.42E-07  | 5.64E-05   |
|           | UCSC_TFBS | HNF4        | 801   | 5.60022373 | 7.03E-13 | MEF2C, LDH/  | 1649       | 7865     | 19536     | 1.2065596    | 1.25E-10   | 6.26E-11  | 8.64E-10   |
|           | UCSC_TFBS | LMO2COM     | 948   | 6.62798014 | 6.57E-11 | MEF2C, ALDI  | 1649       | 9743     | 19536     | 1.15273804   | 1.17E-08   | 2.34E-09  | 8.07E-08   |
|           | UCSC_TFBS | LUN1        | 780   | 5.45340138 | 2.35E-06 | MEF2C, PPP2  | 1649       | 8185     | 19536     | 1.12899212   | 4.19E-04   | 1.61E-05  | 0.00289216 |
|           | UCSC_TFBS | LYF1        | 611   | 4.27183108 | 1.87E-05 | MEF2C, ALDI  | 1649       | 6330     | 19536     | 1.14354298   | 0.00332375 | 8.54E-05  | 0.02299278 |
|           | UCSC_TFBS | MAZR        | 347   | 2.42606446 | 2.71E-05 | S100A3, SLC  | 1649       | 3377     | 19536     | 1.21734424   | 0.0048077  | 1.15E-04  | 0.03328142 |
|           | UCSC_TFBS | MIF1        | 673   | 4.70530658 | 3.59E-07 | MEF2C, PEA   | 1649       | 6859     | 19536     | 1.16243654   | 6.40E-05   | 3.55E-06  | 4.42E-04   |
|           | UCSC_TFBS | MYCMAX      | 974   | 6.80976019 | 5.72E-07 | MEF2C, LDH/  | 1649       | 10413    | 19536     | 1.1081488    | 1.02E-04   | 4.84E-06  | 7.03E-04   |
|           | UCSC_TFBS | MYOGNF1     | 735   | 5.13878207 | 1.06E-05 | MEF2C, HIST  | 1649       | 7733     | 19536     | 1.1260413    | 0.00188494 | 5.72E-05  | 0.01303077 |
|           | UCSC_TFBS | NF1         | 612   | 4.27882262 | 1.79E-08 | MEF2C, HIST  | 1649       | 6048     | 19536     | 1.1988218    | 3.19E-06   | 3.19E-07  | 2.20E-05   |
|           | UCSC_TFBS | NFE2        | 610   | 4.26483954 | 2.56E-12 | MEF2C, ALDI  | 1649       | 5738     | 19536     | 1.25945972   | 4.55E-10   | 1.14E-10  | 3.14E-09   |
|           | UCSC_TFBS | NFKAPPAB5C  | 379   | 2.64979375 | 5.33E-07 | MEF2C, PEA   | 1649       | 3583     | 19536     | 1.25316251   | 9.49E-05   | 4.74E-06  | 6.55E-04   |
|           | UCSC_TFBS | NFKB        | 779   | 5.44640984 | 1.82E-06 | MEF2C, ROR/  | 1649       | 8160     | 19536     | 1.13099918   | 3.24E-04   | 1.35E-05  | 0.00223736 |
|           | UCSC_TFBS | NRSF        | 835   | 5.8379361  | 2.19E-06 | MEF2C, ALDI  | 1649       | 8826     | 19536     | 1.12082431   | 3.90E-04   | 1.56E-05  | 0.00269143 |
|           | UCSC_TFBS | OLF1        | 737   | 5.15276515 | 2.33E-09 | ALDH8A1, PP  | 1649       | 7399     | 19536     | 1.18007457   | 4.14E-07   | 5.17E-08  | 2.86E-06   |
|           | UCSC_TFBS | P53         | 1024  | 7.1593372  | 2.47E-07 | MEF2C, LDH/  | 1649       | 10980    | 19536     | 1.10487363   | 4.40E-05   | 2.59E-06  | 3.04E-04   |
|           | UCSC_TFBS | PAX5        | 891   | 6.22946235 | 8.49E-08 | ALDH8A1, LD  | 1649       | 9340     | 19536     | 1.13017532   | 1.51E-05   | 1.08E-06  | 1.04E-04   |
|           | UCSC_TFBS | PPARA       | 839   | 5.86590226 | 1.60E-05 | MEF2C, PPP2  | 1649       | 8972     | 19536     | 1.10786715   | 0.00284887 | 8.39E-05  | 0.01970335 |
|           | UCSC_TFBS | PPARG       | 1245  | 8.70446759 | 2.10E-05 | MEF2C, LDH/  | 1649       | 13898    | 19536     | 1.06128502   | 0.00373764 | 9.36E-05  | 0.025861   |
|           | UCSC_TFBS | ROAZ        | 720   | 5.03390897 | 1.04E-06 | ALDH8A1, PE  | 1649       | 7449     | 19536     | 1.14511608   | 1.85E-04   | 8.05E-06  | 0.00127868 |
|           | UCSC_TFBS | RREB1       | 626   | 4.37670419 | 4.98E-08 | PEAR1, PPP2  | 1649       | 6245     | 19536     | 1.18756361   | 8.86E-06   | 7.38E-07  | 6.12E-05   |
|           | UCSC_TFBS | SEF1        | 798   | 5.57924911 | 8.08E-07 | MEF2C, ROR/  | 1649       | 8346     | 19536     | 1.13276417   | 1.44E-04   | 6.54E-06  | 9.93E-04   |
|           | UCSC_TFBS | TAL1BETA1TF | 836   | 5.84492764 | 3.45E-06 | MEF2C, OSM   | 1649       | 8860     | 19536     | 1.11786034   | 6.14E-04   | 2.19E-05  | 0.00424161 |
|           | UCSC_TFBS | TAXCREB     | 832   | 5.81696148 | 2.65E-05 | MEF2C, LDH/  | 1649       | 8916     | 19536     | 1.10552421   | 0.00469999 | 1.15E-04  | 0.03253419 |
|           | UCSC_TFBS | USF         | 924   | 6.46018318 | 7.46E-08 | MEF2C, ALDI  | 1649       | 9727     | 19536     | 1.12540294   | 1.33E-05   | 1.02E-06  | 9.17E-05   |
|           | UCSC_TFBS | ZIC3        | 659   | 4.60742502 | 9.88E-13 | PEAR1, SLC9/ | 1649       | 6258     | 19536     | 1.24756978   | 1.76E-10   | 5.86E-11  | 1.21E-09   |
|           | UCSC_TFBS | ZID         | 742   | 5.18772286 | 3.97E-06 | MEF2C, LDH/  | 1649       | 7766     | 19536     | 1.13193506   | 7.07E-04   | 2.44E-05  | 0.00488451 |
|           | UCSC_TFBS | MZF1        | 879   | 4.66436721 | 1.05E-08 | MEF2C, JUB,  | 1879       | 7943     | 19536     | 1.15057035   | 1.85E-06   | 1.85E-06  | 1.29E-05   |

## Cluster 4

|           |            |      |            |          |               |      |       |       |            |            |          |            |
|-----------|------------|------|------------|----------|---------------|------|-------|-------|------------|------------|----------|------------|
| UCSC_TFBS | PAX2       | 1042 | 5.52931812 | 5.79E-08 | MEF2C, JUB,   | 1879 | 9688  | 19536 | 1.11825914 | 1.02E-05   | 5.12E-06 | 7.11E-05   |
| UCSC_TFBS | COUP       | 757  | 4.01698063 | 7.37E-08 | MEF2C, PDP1   | 1879 | 6778  | 19536 | 1.16118972 | 1.30E-05   | 4.35E-06 | 9.05E-05   |
| UCSC_TFBS | USF        | 1044 | 5.53993102 | 9.07E-08 | MEF2C, JUB,   | 1879 | 9727  | 19536 | 1.11591329 | 1.61E-05   | 4.01E-06 | 1.11E-04   |
| UCSC_TFBS | SREBP1     | 1066 | 5.65667286 | 3.60E-07 | MEF2C, AIF1,  | 1879 | 10014 | 19536 | 1.10677282 | 6.37E-05   | 1.27E-05 | 4.42E-04   |
| UCSC_TFBS | ELK1       | 887  | 4.70681878 | 5.56E-07 | MEF2C, TME    | 1879 | 8177  | 19536 | 1.12781662 | 9.84E-05   | 1.64E-05 | 6.83E-04   |
| UCSC_TFBS | P300       | 677  | 3.59246484 | 1.22E-06 | SLC9A9, PDP   | 1879 | 6083  | 19536 | 1.15712351 | 2.15E-04   | 3.08E-05 | 0.00149466 |
| UCSC_TFBS | NFE2       | 641  | 3.40143274 | 1.86E-06 | SLC9A9, MEF   | 1879 | 5738  | 19536 | 1.1614656  | 3.30E-04   | 4.12E-05 | 0.00228995 |
| UCSC_TFBS | STAT3      | 838  | 4.44680287 | 2.09E-06 | MEF2C, PDP1   | 1879 | 7730  | 19536 | 1.1271284  | 3.70E-04   | 4.12E-05 | 0.00257108 |
| UCSC_TFBS | NFKAPPAB   | 639  | 3.39081985 | 2.15E-06 | HCCS, SLC9A9  | 1879 | 5726  | 19536 | 1.16026818 | 3.80E-04   | 3.80E-05 | 0.00263539 |
| UCSC_TFBS | RORA2      | 838  | 4.44680287 | 2.24E-06 | MEF2C, JUB,   | 1879 | 7734  | 19536 | 1.12654545 | 3.96E-04   | 3.60E-05 | 0.00274646 |
| UCSC_TFBS | PAX4       | 1350 | 7.1637039  | 4.67E-06 | PDP1, MEF2C   | 1879 | 13147 | 19536 | 1.06761821 | 8.27E-04   | 6.90E-05 | 0.00574198 |
| UCSC_TFBS | PPARG      | 1419 | 7.52984877 | 4.82E-06 | PDP1, MEF2C   | 1879 | 13898 | 19536 | 1.06154633 | 8.52E-04   | 6.56E-05 | 0.00591586 |
| UCSC_TFBS | STAT1      | 706  | 3.74635182 | 6.59E-06 | SLC9A9, MEF   | 1879 | 6442  | 19536 | 1.13944364 | 0.00116606 | 8.33E-05 | 0.00809628 |
| UCSC_TFBS | RFX1       | 1073 | 5.69381799 | 7.03E-06 | MEF2C, SCNE   | 1879 | 10219 | 19536 | 1.09169215 | 0.00124303 | 8.29E-05 | 0.00863098 |
| UCSC_TFBS | EVI1       | 1411 | 7.48739719 | 1.16E-05 | PDP1, MEF2C   | 1879 | 13849 | 19536 | 1.05929632 | 0.0020481  | 1.28E-04 | 0.01422636 |
| UCSC_TFBS | AHR        | 600  | 3.1838684  | 1.24E-05 | JUB, FHIT, SL | 1879 | 5409  | 19536 | 1.15330224 | 0.00219448 | 1.29E-04 | 0.01524415 |
| UCSC_TFBS | E47        | 1061 | 5.63014062 | 1.49E-05 | PDP1, MEF2C   | 1879 | 10129 | 19536 | 1.08907473 | 0.0026422  | 1.47E-04 | 0.01835812 |
| UCSC_TFBS | MYCMAX     | 1088 | 5.7734147  | 1.60E-05 | MEF2C, JUB,   | 1879 | 10413 | 19536 | 1.0863303  | 0.00282035 | 1.49E-04 | 0.01959755 |
| UCSC_TFBS | AP4        | 1118 | 5.93260812 | 1.69E-05 | MEF2C, JUB,   | 1879 | 10734 | 19536 | 1.08290181 | 0.00298883 | 1.50E-04 | 0.02076984 |
| UCSC_TFBS | HMX1       | 802  | 4.25577076 | 1.89E-05 | PDP1, JUB, TI | 1879 | 7467  | 19536 | 1.11670146 | 0.00333883 | 1.59E-04 | 0.0232059  |
| UCSC_TFBS | NF1        | 662  | 3.51286813 | 1.91E-05 | MEF2C, PDP1   | 1879 | 6048  | 19536 | 1.13803357 | 0.00336809 | 1.53E-04 | 0.02340956 |
| UCSC_TFBS | NKX25      | 1101 | 5.84239851 | 2.21E-05 | MEF2C, JUB,   | 1879 | 10569 | 19536 | 1.08308437 | 0.0038971  | 1.70E-04 | 0.02709306 |
| UCSC_TFBS | NGFIC      | 532  | 2.82302998 | 2.28E-05 | PDP1, MEF2C   | 1879 | 4760  | 19536 | 1.16201985 | 0.00402926 | 1.68E-04 | 0.02801359 |
| UCSC_TFBS | NFKAPPAB5C | 412  | 2.1862563  | 2.45E-05 | MEF2C, SCNE   | 1879 | 3583  | 19536 | 1.19552669 | 0.00433459 | 1.74E-04 | 0.0301407  |
| UCSC_TFBS | CREBP1     | 826  | 4.3831255  | 2.59E-05 | MEF2C, PDP1   | 1879 | 7723  | 19536 | 1.11199511 | 0.00458247 | 1.77E-04 | 0.031868   |
| UCSC_TFBS | PPARA      | 947  | 5.02520562 | 2.66E-05 | MEF2C, SCNE   | 1879 | 8972  | 19536 | 1.09741169 | 0.00469193 | 1.74E-04 | 0.03263095 |
| UCSC_TFBS | TAXCREB    | 941  | 4.99336694 | 2.99E-05 | MEF2C, JUB,   | 1879 | 8916  | 19536 | 1.09730771 | 0.00528335 | 1.89E-04 | 0.03675421 |
| UCSC_TFBS | MYCMAX     | 2566 | 5.9036006  | 5.53E-12 | MEF2C, AIF1,  | 4440 | 10413 | 19536 | 1.08426006 | 9.78E-10   | 9.78E-10 | 6.79E-09   |
| UCSC_TFBS | NF1        | 1553 | 3.57298976 | 3.93E-11 | MEF2C, IL9R,  | 4440 | 6048  | 19536 | 1.12982804 | 6.96E-09   | 3.48E-09 | 4.83E-08   |
| UCSC_TFBS | NMYC       | 1318 | 3.03232486 | 9.63E-11 | MEF2C, CTHF   | 4440 | 5067  | 19536 | 1.14450365 | 1.70E-08   | 5.68E-09 | 1.18E-07   |
| UCSC_TFBS | NFKB       | 2039 | 4.69113079 | 1.23E-10 | RBPM52, ME    | 4440 | 8160  | 19536 | 1.09946078 | 2.18E-08   | 5.45E-09 | 1.51E-07   |
| UCSC_TFBS | MYOD       | 2285 | 5.25710342 | 1.58E-10 | MEF2C, ASCC   | 4440 | 9239  | 19536 | 1.08821301 | 2.81E-08   | 5.61E-09 | 1.95E-07   |
| UCSC_TFBS | PAX5       | 2306 | 5.30541815 | 2.39E-10 | AIF1, ASCC1,  | 4440 | 9340  | 19536 | 1.08633833 | 4.24E-08   | 7.06E-09 | 2.94E-07   |
| UCSC_TFBS | IK3        | 1823 | 4.19417922 | 3.68E-10 | MEF2C, MEF    | 4440 | 7246  | 19536 | 1.10698316 | 6.52E-08   | 9.32E-09 | 4.53E-07   |
| UCSC_TFBS | ELK1       | 2038 | 4.68883009 | 3.73E-10 | RBPM52, ME    | 4440 | 8177  | 19536 | 1.09663691 | 6.60E-08   | 8.25E-09 | 4.58E-07   |
| UCSC_TFBS | PAX2       | 2382 | 5.48027148 | 4.56E-10 | MEF2C, IL9R,  | 4440 | 9688  | 19536 | 1.0818332  | 8.08E-08   | 8.98E-09 | 5.61E-07   |
| UCSC_TFBS | USF        | 2389 | 5.49637639 | 7.23E-10 | MEF2C, MEF    | 4440 | 9727  | 19536 | 1.08066207 | 1.28E-07   | 1.28E-08 | 8.88E-07   |
| UCSC_TFBS | XBP1       | 2008 | 4.61980904 | 1.06E-08 | MEF2C, IL9R,  | 4440 | 8117  | 19536 | 1.08848097 | 1.88E-06   | 1.71E-07 | 1.30E-05   |
| UCSC_TFBS | AREB6      | 3411 | 7.84769355 | 1.49E-08 | AMOTL1, AN    | 4440 | 14383 | 19536 | 1.04348189 | 2.64E-06   | 2.20E-07 | 1.84E-05   |
| UCSC_TFBS | RFX1       | 2485 | 5.71724376 | 1.57E-08 | RBPM52, ME    | 4440 | 10219 | 19536 | 1.06996771 | 2.78E-06   | 2.14E-07 | 1.93E-05   |
| UCSC_TFBS | HTF        | 2163 | 4.97641781 | 3.21E-08 | MEF2C, MEF    | 4440 | 8818  | 19536 | 1.07929236 | 5.69E-06   | 4.06E-07 | 3.95E-05   |
| UCSC_TFBS | ARP1       | 1923 | 4.4242494  | 3.34E-08 | RBPM52, ME    | 4440 | 7772  | 19536 | 1.0886773  | 5.91E-06   | 3.94E-07 | 4.10E-05   |
| UCSC_TFBS | CP2        | 1600 | 3.68112274 | 4.03E-08 | MEF2C, RBPM   | 4440 | 6383  | 19536 | 1.10292966 | 7.13E-06   | 4.46E-07 | 4.95E-05   |
| UCSC_TFBS | MYOGNF1    | 1912 | 4.39894168 | 4.10E-08 | RBPM52, ME    | 4440 | 7733  | 19536 | 1.08790896 | 7.26E-06   | 4.27E-07 | 5.04E-05   |

# Cluster 7

|           |             |      |            |          |              |      |       |       |            |            |          |            |
|-----------|-------------|------|------------|----------|--------------|------|-------|-------|------------|------------|----------|------------|
| UCSC_TFBS | ARNT        | 1918 | 4.41274589 | 4.70E-08 | SYNCRIP, SN  | 4440 | 7760  | 19536 | 1.08752577 | 8.32E-06   | 4.62E-07 | 5.77E-05   |
| UCSC_TFBS | IRF2        | 1659 | 3.81686414 | 4.99E-08 | MEF2C, MEF   | 4440 | 6641  | 19536 | 1.09917181 | 8.84E-06   | 4.65E-07 | 6.13E-05   |
| UCSC_TFBS | AML1        | 3118 | 7.17358794 | 5.87E-08 | RPLP0, LRRC  | 4440 | 13077 | 19536 | 1.04910912 | 1.04E-05   | 5.19E-07 | 7.20E-05   |
| UCSC_TFBS | COUP        | 1689 | 3.88588519 | 6.73E-08 | MEF2C, REP1  | 4440 | 6778  | 19536 | 1.09642963 | 1.19E-05   | 5.67E-07 | 8.27E-05   |
| UCSC_TFBS | SEF1        | 2050 | 4.71643851 | 7.75E-08 | RBPM2, ME    | 4440 | 8346  | 19536 | 1.08075725 | 1.37E-05   | 6.24E-07 | 9.52E-05   |
| UCSC_TFBS | SREBP1      | 2429 | 5.58840446 | 9.18E-08 | MEF2C, MEF   | 4440 | 10014 | 19536 | 1.06726583 | 1.62E-05   | 7.06E-07 | 1.13E-04   |
| UCSC_TFBS | CREB        | 1728 | 3.97561256 | 1.14E-07 | MEF2C, MEF   | 4440 | 6956  | 19536 | 1.09304198 | 2.02E-05   | 8.42E-07 | 1.40E-04   |
| UCSC_TFBS | PAX4        | 3126 | 7.19199356 | 2.51E-07 | RPLP0, LRRC  | 4440 | 13147 | 19536 | 1.04620065 | 4.43E-05   | 1.77E-06 | 3.08E-04   |
| UCSC_TFBS | EN1         | 2148 | 4.94190728 | 3.55E-07 | MEF2C, MEF   | 4440 | 8809  | 19536 | 1.07290271 | 6.28E-05   | 2.42E-06 | 4.36E-04   |
| UCSC_TFBS | P53         | 2640 | 6.07385253 | 3.58E-07 | MEF2C, MEF   | 4440 | 10980 | 19536 | 1.0579235  | 6.34E-05   | 2.35E-06 | 4.40E-04   |
| UCSC_TFBS | NFKAPPAB65  | 911  | 2.09593926 | 4.23E-07 | AIF1, PPP2R5 | 4440 | 3510  | 19536 | 1.1419943  | 7.48E-05   | 2.67E-06 | 5.19E-04   |
| UCSC_TFBS | GRE         | 1905 | 4.38283677 | 5.10E-07 | RBPM2, ME    | 4440 | 7760  | 19536 | 1.08015464 | 9.03E-05   | 3.11E-06 | 6.27E-04   |
| UCSC_TFBS | LYF1        | 1574 | 3.6213045  | 5.35E-07 | MEF2C, RBPM  | 4440 | 6330  | 19536 | 1.09409163 | 9.47E-05   | 3.16E-06 | 6.57E-04   |
| UCSC_TFBS | GR          | 2086 | 4.79926378 | 5.71E-07 | MEF2C, IL9R, | 4440 | 8551  | 19536 | 1.07337154 | 1.01E-04   | 3.26E-06 | 7.01E-04   |
| UCSC_TFBS | STAT5A      | 2302 | 5.29621535 | 7.18E-07 | MEF2C, IL9R, | 4440 | 9504  | 19536 | 1.06574074 | 1.27E-04   | 3.97E-06 | 8.82E-04   |
| UCSC_TFBS | ATF6        | 1839 | 4.23099045 | 7.41E-07 | RBPM2, ME    | 4440 | 7481  | 19536 | 1.0816201  | 1.31E-04   | 3.98E-06 | 9.11E-04   |
| UCSC_TFBS | TCF11MAFG   | 2105 | 4.84297711 | 8.90E-07 | MEF2C, IL9R, | 4440 | 8647  | 19536 | 1.07112293 | 1.57E-04   | 4.63E-06 | 0.00109261 |
| UCSC_TFBS | CEBPB       | 2211 | 5.08685149 | 9.45E-07 | MEF2C, MEF   | 4440 | 9112  | 19536 | 1.06764706 | 1.67E-04   | 4.78E-06 | 0.00116043 |
| UCSC_TFBS | IK2         | 1222 | 2.81145749 | 9.75E-07 | MEF2C, MEF   | 4440 | 4836  | 19536 | 1.11182796 | 1.72E-04   | 4.79E-06 | 0.00119699 |
| UCSC_TFBS | MZF1        | 1942 | 4.46796273 | 1.28E-06 | MEF2C, AIF1, | 4440 | 7943  | 19536 | 1.07576482 | 2.27E-04   | 6.14E-06 | 0.00157727 |
| UCSC_TFBS | NFKAPPAB    | 1427 | 3.28310135 | 1.59E-06 | RBPM2, IL9I  | 4440 | 5726  | 19536 | 1.09654209 | 2.82E-04   | 7.41E-06 | 0.00195443 |
| UCSC_TFBS | NRF2        | 1204 | 2.77004486 | 1.81E-06 | MEF2C, PPP2  | 4440 | 4774  | 19536 | 1.10967742 | 3.21E-04   | 8.22E-06 | 0.00222539 |
| UCSC_TFBS | TAXCREB     | 2162 | 4.97411711 | 1.91E-06 | RBPM2, ME    | 4440 | 8916  | 19536 | 1.06693585 | 3.38E-04   | 8.45E-06 | 0.00234677 |
| UCSC_TFBS | ER          | 2036 | 4.68422869 | 2.01E-06 | MEF2C, AIF1, | 4440 | 8363  | 19536 | 1.07119455 | 3.56E-04   | 8.69E-06 | 0.00247145 |
| UCSC_TFBS | MEIS1       | 1863 | 4.28620729 | 2.07E-06 | RBPM2, ME    | 4440 | 7612  | 19536 | 1.07687861 | 3.66E-04   | 8.71E-06 | 0.00253969 |
| UCSC_TFBS | TAL1BETAITF | 2148 | 4.94190728 | 2.50E-06 | MEF2C, AIF1, | 4440 | 8860  | 19536 | 1.06672686 | 4.43E-04   | 1.03E-05 | 0.00307488 |
| UCSC_TFBS | AHRARNT     | 2098 | 4.8268722  | 2.84E-06 | MEF2C, MEF   | 4440 | 8647  | 19536 | 1.067561   | 5.03E-04   | 1.14E-05 | 0.00348936 |
| UCSC_TFBS | GATA3       | 958  | 2.20407224 | 2.92E-06 | MEF2C, AIF1, | 4440 | 3744  | 19536 | 1.1258547  | 5.16E-04   | 1.15E-05 | 0.00358191 |
| UCSC_TFBS | STAT3       | 1887 | 4.34142413 | 3.50E-06 | MEF2C, IL9R, | 4440 | 7730  | 19536 | 1.07410091 | 6.20E-04   | 1.35E-05 | 0.00430504 |
| UCSC_TFBS | TCF11       | 2024 | 4.65662027 | 3.51E-06 | MEF2C, REP1  | 4440 | 8326  | 19536 | 1.06961326 | 6.21E-04   | 1.32E-05 | 0.00430989 |
| UCSC_TFBS | P300        | 1506 | 3.46485678 | 3.65E-06 | VKORC1L1, A  | 4440 | 6083  | 19536 | 1.08933092 | 6.45E-04   | 1.35E-05 | 0.00448078 |
| UCSC_TFBS | TAL1BETA4   | 1174 | 2.70102381 | 5.19E-06 | MEF2C, PPP2  | 4440 | 4674  | 19536 | 1.10517758 | 9.18E-04   | 1.87E-05 | 0.00637157 |
| UCSC_TFBS | ZIC3        | 1544 | 3.55228345 | 5.57E-06 | RBPM2, AIF   | 4440 | 6258  | 19536 | 1.08558645 | 9.86E-04   | 1.97E-05 | 0.00684671 |
| UCSC_TFBS | MRF2        | 2019 | 4.64511676 | 7.09E-06 | RBPM2, ME    | 4440 | 8325  | 19536 | 1.0670991  | 0.00125417 | 2.46E-05 | 0.00870837 |
| UCSC_TFBS | CEBP        | 3062 | 7.04474865 | 7.90E-06 | AMOTL1, AV   | 4440 | 12945 | 19536 | 1.0407725  | 0.00139722 | 2.69E-05 | 0.00970229 |
| UCSC_TFBS | PAX6        | 2154 | 4.95571149 | 9.83E-06 | RBPM2, ME    | 4440 | 8924  | 19536 | 1.06203496 | 0.00173858 | 3.28E-05 | 0.01207466 |
| UCSC_TFBS | GATA2       | 1376 | 3.16576556 | 1.15E-05 | RBPM2, ME    | 4440 | 5555  | 19536 | 1.08990099 | 0.002036   | 3.77E-05 | 0.01414224 |
| UCSC_TFBS | CREL        | 674  | 1.55067296 | 1.42E-05 | TGOLN2, DLC  | 4440 | 2589  | 19536 | 1.14546157 | 0.00251161 | 4.57E-05 | 0.01744971 |
| UCSC_TFBS | SP1         | 1000 | 2.30070171 | 1.45E-05 | MEF2C, LDH   | 4440 | 3957  | 19536 | 1.1119535  | 0.00256591 | 4.59E-05 | 0.01782739 |
| UCSC_TFBS | AP1FJ       | 1193 | 2.74473714 | 1.67E-05 | MEF2C, AMC   | 4440 | 4779  | 19536 | 1.09838878 | 0.00295278 | 5.19E-05 | 0.020519   |
| UCSC_TFBS | GCNF        | 2271 | 5.22489359 | 1.86E-05 | MEF2C, AIF1, | 4440 | 9457  | 19536 | 1.05661415 | 0.00328861 | 5.68E-05 | 0.0228563  |
| UCSC_TFBS | SRF         | 2803 | 6.4488669  | 1.93E-05 | RBPM2, ME    | 4440 | 11813 | 19536 | 1.04403623 | 0.00340322 | 5.78E-05 | 0.02365409 |
| UCSC_TFBS | MYB         | 1796 | 4.13206028 | 2.07E-05 | MEF2C, AIF1, | 4440 | 7386  | 19536 | 1.06991606 | 0.00365327 | 6.10E-05 | 0.02539502 |
| UCSC_TFBS | CHOP        | 1909 | 4.39203957 | 2.13E-05 | MEF2C, MEF   | 4440 | 7875  | 19536 | 1.06661587 | 0.0037621  | 6.18E-05 | 0.02615287 |

|           |           |      |            |          |              |      |       |       |            |            |          |            |
|-----------|-----------|------|------------|----------|--------------|------|-------|-------|------------|------------|----------|------------|
| UCSC_TFBS | CETS1P54  | 1011 | 2.32600943 | 2.15E-05 | MEF2C, PPP2  | 4440 | 4011  | 19536 | 1.10905011 | 0.00379252 | 6.13E-05 | 0.02636471 |
| UCSC_TFBS | IK1       | 1413 | 3.25089152 | 2.17E-05 | RBPMS2, CTI  | 4440 | 5730  | 19536 | 1.08502618 | 0.00382756 | 6.09E-05 | 0.02660877 |
| UCSC_TFBS | HMX1      | 1815 | 4.17577361 | 2.17E-05 | ASCC1, SYNC  | 4440 | 7467  | 19536 | 1.06950583 | 0.00384073 | 6.01E-05 | 0.02670046 |
| UCSC_TFBS | ISRE      | 1745 | 4.01472449 | 2.20E-05 | RBPMS2, ME   | 4440 | 7163  | 19536 | 1.07189725 | 0.00387768 | 5.98E-05 | 0.02695778 |
| UCSC_TFBS | HSF2      | 1662 | 3.82376625 | 2.25E-05 | MEF2C, KIAA  | 4440 | 6801  | 19536 | 1.07525364 | 0.00397483 | 6.03E-05 | 0.02763447 |
| UCSC_TFBS | IRF7      | 1791 | 4.12055677 | 2.38E-05 | RBPMS2, ME   | 4440 | 7368  | 19536 | 1.06954397 | 0.00420355 | 6.29E-05 | 0.02922769 |
| UCSC_TFBS | MIF1      | 1674 | 3.85137467 | 2.46E-05 | MEF2C, RBP   | 4440 | 6859  | 19536 | 1.07385916 | 0.0043428  | 6.40E-05 | 0.03019792 |
| UCSC_TFBS | HSF1      | 1216 | 2.79765328 | 2.55E-05 | MEF2C, IL9R, | 4440 | 4890  | 19536 | 1.09415133 | 0.00450262 | 6.54E-05 | 0.03131152 |
| UCSC_TFBS | 30-Sep    | 3547 | 8.16058898 | 2.87E-05 | ZNF782, AM   | 4440 | 15177 | 19536 | 1.02831917 | 0.00507225 | 7.26E-05 | 0.03528222 |
| UCSC_TFBS | TAL1ALPHA | 829  | 1.90728172 | 3.27E-05 | MEF2C, REP1  | 4440 | 3254  | 19536 | 1.12095882 | 0.00577522 | 8.16E-05 | 0.04018522 |
| UCSC_TFBS | RREB1     | 1530 | 3.52007362 | 3.31E-05 | AIF1, SYNCRI | 4440 | 6245  | 19536 | 1.07798239 | 0.00583611 | 8.13E-05 | 0.04061005 |
| UCSC_TFBS | AP1       | 2379 | 5.47336938 | 3.78E-05 | MEF2C, IL9R, | 4440 | 9952  | 19536 | 1.05180868 | 0.00666537 | 9.16E-05 | 0.04639839 |
